# Supplementary material for: Can Swallowing Cerebral Neurophysiology Be Evaluated during Ecological Food Intake Conditions? A Systematic Literature Review
Source: MDPI journal article supplement (doi:10.3390/jcm11185480), 2022-09-18
Supplement: s1 [file s1]

| Supplementary Table S1: Technical characteristics of EEG, fNIRS, MEG: methodology, swallowing sequences and measure of interest as reported in the included studies, compared to the fMRI gold standard. |                                                  |                    |                        |                                 |                   |                                                        |                               |                                                             |                            |                      |                           |                                                                                                                                    |
|----------------------------------------------------------------------------------------------------------------------------------------------------------------------------------------------------------|--------------------------------------------------|--------------------|------------------------|---------------------------------|-------------------|--------------------------------------------------------|-------------------------------|-------------------------------------------------------------|----------------------------|----------------------|---------------------------|------------------------------------------------------------------------------------------------------------------------------------|
| Technique and signal type                                                                                                                                                                                | Standard number of captors                       | Spatial resolution | Temporal sampling rate | Studied phase of swallowing act | Number of studies | Measures                                               | Type of analyses <sup>a</sup> | Median time window from swallowing act onset (ms) [Min:Max] |                            | Median ISI [Min:Max] | Task iterations (Min-Max) | Region of interest <sup>c</sup>                                                                                                    |
|                                                                                                                                                                                                          |                                                  |                    |                        |                                 |                   |                                                        |                               | Median start time                                           | Median end time            |                      |                           |                                                                                                                                    |
| EEG                                                                                                                                                                                                      | Whole head 64 electrodes channels                | 1mm                | 200Hz-500Hz            | Preparation                     | 3                 | Negative potentials [12,13,15] MRCP, BP, CNV           | Topographic                   | -5,000 [ -6,000 : -3,000 ]                                  | 1,000 [ 1,000 : 2000 ]     | 10-30s               | 50-480                    | Cz, Fz, FCz, Pz,                                                                                                                   |
|                                                                                                                                                                                                          |                                                  |                    |                        |                                 | 1                 | Signal complexity through Approximate entropy[20]      | Topographic                   | -1,024                                                      | 0                          | 30s                  | 20                        | P3, P4, C3, C4, F4, T5, T5                                                                                                         |
|                                                                                                                                                                                                          |                                                  |                    |                        | Preparation and execution       | 1                 | Negative potentials (MRCP) and positive potential[14]  | Topographic                   | -1,500                                                      | 1,000                      | 10s                  | 50                        | C3, C4,Cz                                                                                                                          |
|                                                                                                                                                                                                          |                                                  |                    |                        |                                 | 4                 | Time-frequency based synchrony[16-18,21]               | Network micro-architecture    | -                                                           | -                          | 2-3s                 | 5                         | Whole head                                                                                                                         |
|                                                                                                                                                                                                          |                                                  |                    |                        |                                 | 1                 | Time-frequency based magnitude[22]                     | Topographic                   | -                                                           | -                          | -                    | 1                         | C3, C4                                                                                                                             |
|                                                                                                                                                                                                          |                                                  |                    |                        | Execution                       | 1                 | Time frequency spectral power density [19]             | Topographic                   | -1,000                                                      | 3,000                      | 2s                   | 80                        | C3, C4,Cz                                                                                                                          |
| fNIRS                                                                                                                                                                                                    | Targetted optical hemoglobins concentrations HDR | 2-3cm              | 7-50Hz                 | Execution                       | 6                 | OxyHb relative concentration alone[47–50,52,54]        | Topographic                   | -5,000 [-20,000:-5,000]                                     | 37,500 [ 22,000 : 60,000 ] | 30s [20:60s]         | 3-30                      | Caudal pericentral Cx PMC, SMA, PFC                                                                                                |
|                                                                                                                                                                                                          |                                                  |                    |                        |                                 | 5                 | OxyHb and DeoxyHb relative concentration [44-46,51,53] | Topographic                   | -5,000 [ -5,000 : -5,000 ]                                  | 25,000 [ 15,000 : 25,000 ] | 30s [30:30s]         | 10-20                     | Inferior frontal gyrus                                                                                                             |
| MEG                                                                                                                                                                                                      | Whole head 275 SQUID sensors (151 to 306)        | 1mm                | 400-600Hz              | Preparation                     | 2                 | Equivalent magnetic dipole localization [24,27]        | Tomographic                   | -2,500 [ -2,500 : -2,500 ]                                  | 500 [ 500 : 500 ]          | 30s                  | 30-50                     | Whole head Cingulate gyrus SMA Insula Inferior frontal gyrus                                                                       |
|                                                                                                                                                                                                          |                                                  |                    |                        | Preparation and execution       | 16                | Time-frequency domain ERS and ERD [25,29–39,40–43]     | Tomographic                   | -3,000 [ -4,000 : -400 ]                                    | 2,000 [ 600 : 2,000 ]      | 10-15s               | 40-100                    | Whole head Pericentral Cx PMC, SMA, PFC Parietal Cx Insula                                                                         |
|                                                                                                                                                                                                          |                                                  |                    |                        | Execution                       | 1                 | Averaged time-series[23]                               | Topographic                   | -500                                                        | 1,500                      | 10s                  | 100                       | Whole head : No result                                                                                                             |
|                                                                                                                                                                                                          |                                                  |                    |                        |                                 | 2                 | Time-frequency domain ERS and ERD[26,28]               | Tomographic                   | 0                                                           | 4,000 [3,000:5,000]        | 6-15s                | 20-100                    | Whole head Pericentral Cx Parietal Cx                                                                                              |
| fMRI <sup>b</sup>                                                                                                                                                                                        | BOLD signal                                      | 3-5mm              | 14.5Hz                 | Preparation and execution       | -                 | -                                                      | Tomographic                   | -                                                           | -                          | 15s                  | 10                        | Primary sensorimotor Cx, PMC, SMA, PFC, Heschl’s gyrus, cingulate gurus, insula, Broca’s areas, superior temporal gyrus, precuneus |
|                                                                                                                                                                                                          | Whole head BOLD signal HDR                       |                    |                        |                                 |                   | But the HDR has a temporal resolution >1s              |                               |                                                             |                            |                      |                           |                                                                                                                                    |

BP : Bereitschaftspotential

BOLD : Blood oxygen level dependent

CNV : Contingent negative variation

a. A topographic analysis is limited to the superficial cortical layer, whereas a tomographic method can explore deeper structure (e.g. grey nuclei, insula, cingulum).

b. fMRI data as reported in reviews by Malandraki et al. [57] and Ludlow et al.[1,4].

c. The region of interest is defined based on the technique data reported in the included studies. Only the most relevant electrode/channels/areas across studies were reported. For MEG studies, the whole head coverage was reported as necessary to calculate the source of the activity.

For details and equivalence between the 10-10 system, Brodmann areas and gyrus, see supplementary tables 2 to 4.

Cx : Cortex

HDR : Hemodynamic response

ISI : Inter-stimulus interval

MRCP : Movement related cortical potential

PFC : Prefrontal cortex

PMC : Premotor cortex

SMA : Supplementary motor area

SQUID : superconducting quantum interference devices

Supplementary Table S2: EEG studies data.

| EEG Reference      | QualSyst score (%) <sup>b</sup> | NHMRC <sup>c</sup> | Objectives                                                                                                                                                                                                                                                                                                                                                                                                                                                                                                   | Number of subjects analyzed | Age                   | Female/Male | Tasks and/or conditions (bold: eligible for the review)                                                                                                                               | Number of trials       | Measure                                                                                                                                                                                                                                                                                                                      | Review conclusions                                                                                                                                                                                                                                                                                                                | Locus of interest 10-10 system <sup>a</sup> | Locus of interest Brodmann Areas <sup>a</sup> | Locus of interest Anatomical gyri <sup>a</sup>                                                         |
|--------------------|---------------------------------|--------------------|--------------------------------------------------------------------------------------------------------------------------------------------------------------------------------------------------------------------------------------------------------------------------------------------------------------------------------------------------------------------------------------------------------------------------------------------------------------------------------------------------------------|-----------------------------|-----------------------|-------------|---------------------------------------------------------------------------------------------------------------------------------------------------------------------------------------|------------------------|------------------------------------------------------------------------------------------------------------------------------------------------------------------------------------------------------------------------------------------------------------------------------------------------------------------------------|-----------------------------------------------------------------------------------------------------------------------------------------------------------------------------------------------------------------------------------------------------------------------------------------------------------------------------------|---------------------------------------------|-----------------------------------------------|--------------------------------------------------------------------------------------------------------|
| Physiology         |                                 |                    |                                                                                                                                                                                                                                                                                                                                                                                                                                                                                                              |                             |                       |             |                                                                                                                                                                                       |                        |                                                                                                                                                                                                                                                                                                                              |                                                                                                                                                                                                                                                                                                                                   |                                             |                                               |                                                                                                        |
| Huckabee 2003 [12] | 17/20 (85%) Strong              | IV                 | To evaluate the role of the cerebral cortex in the motor planning and initiation of deglutitive behavior, focusing on Bereischaftpotential (BP)                                                                                                                                                                                                                                                                                                                                                              | 20                          | Age range: 18-35      | 10/10       | <b>Task 1: Self-paced breathing 5s pause-preceeded volitional saliva swallowing "with effort"</b><br><br>Task 2: Finger press movement                                                | 180<br><br>180         | Negative potentials: BP onset time and amplitude                                                                                                                                                                                                                                                                             | Swallowing evokes a 1 phase BP that can be measured on Cz FCz FC1z FC2z during the [-5000ms:0ms] time window<br><br>Trend for lower amplitude for swallowing at 4 time points (p<0.10)<br><br>BP for finger tapping was not significantly earlier than for swallowing<br>No lateralization                                        | Cz<br>FCz<br>FC1z<br>FC2z                   | BA4<br>BA6<br>BA6L<br>BA6R                    | Precentral gyrus (M1)<br>PMC and SMA                                                                   |
| Satow 2004 [13]    | 18/20 (90%) Strong              | IV                 | To clarify whether the hemispheric dominance can be determined in the preparatory period of swallowing or not.                                                                                                                                                                                                                                                                                                                                                                                               | 8                           | Age range: 24-38      | 1/7         | <b>Task 1: Self-paced 2-3 ml water swallowing</b><br><br>Task 2: Tongue protrusion                                                                                                    | 240-480<br><br>240-480 | Negative potentials: BP amplitude, duration and laterality index                                                                                                                                                                                                                                                             | Earlier BP with swallowing (p=0.012), maximum at vertex midline (Cz) during the [-3000ms:0ms] time window.<br>No lateralization.                                                                                                                                                                                                  | Cz                                          | BA4                                           | Precentral gyrus (M1)                                                                                  |
| Hiraoka 2004 [14]  | 15/22 (68%) Good                | IV                 | To differentiate among the cortical activities of motor preparation, execution, and regulation of swallowing using Movement Related Cortical potentials (MRCPs)                                                                                                                                                                                                                                                                                                                                              | 7                           | Age range: 19-37      | na          | <b>Task 1: Self-paced volitional saliva swallowing</b><br><br>Task 2: Self-paced volitional water swallowing from glass in right hand (with 10s rest between infusion and swallowing) | 50<br><br>50           | Negative potentials BP amplitude and onset time<br><br>-MRCP (negative slow cortical "SMA" potential before uncued voluntary movement)                                                                                                                                                                                       | MRCP/BP amplitude is greater with saliva than water (p=0.035) and can be measured on C3, C4 and CZ within a [-1500ms:0ms] time window.<br>Positive potential amplitude during execution is greater with water than saliva (p=0.048) and can be measured on C3, C4 and CZ within a [0ms:1000ms] time window.<br>No lateralization. | C3<br>C4<br>Cz                              | BA1,3,4L<br>BA1,3R<br>BA4                     | Left Pericentral Cx<br>Right Postcentral gyrus (S1)<br>Precentral gyrus (M1)                           |
| Nonaka 2009 [15]   | 19/22 (86%) Strong              | IV                 | To compare the waveforms of contingent negative variation (CNV) associated with the command swallowing task with those of movement related cortical potential (MRCP) associated with the volitional (self-paced) swallowing task in healthy adults.<br><br>To elucidate the effects of human swallowing training on brain activities preceding the onset of swallowing.                                                                                                                                      | 10                          | Mean age: 27.5 (±1.9) | 5/5         | <b>Task 1: Self-paced breathing 4-6s pause-preceeded volitional saliva swallowing "with effort"</b><br><br>Task2: Auditory cued Breathing 4s pause-preceeded saliva swallowing task   | >50<br><br>>50         | Negative potentials maximum amplitude, duration and area under curve<br>-CNV (negative slow cortical "prefrontal" potential before instructed 2nd stimuli cued motor response)<br>-CNV' (negative slow cortical "prefrontal" potential before the muscle activity after instructed 2nd stimuli cued motor response)<br>-MRCP | Negative preparatory potentials (CNV and MRCP) can be measured on Fz, Cz, Pz, C3, and C4 (mostly Cz and Fz) up to 2sec before the swallowing muscular movement. Their onset time depends on the task type (cued or volitional).<br><br>CNV amplitude stronger than MRCP amplitude (p<0.01)<br>Stronger CNV' at Cz (p<0.05)        | Fz<br>Cz<br>Pz<br>C3<br>C4                  | BA6<br>BA4<br>BA7<br>BA1,3,4L<br>BA1,3R       | PMC<br>Precentral gyrus (M1)<br>Parietal lobule<br>Left pericentral Cx<br>Right Postcentral gyrus (S1) |
| Cuellar 2016 [19]  | 18/22 (82%) Strong              | IV                 | To use Independant Component Analysis (ICA) to identify bilateral sensorimotor mu components and infrahyoid muscle components in the primarily reflexive pharyngeal and esophageal phases of swallowing and a voluntary tongue-tapping task<br><br>To use event-related spectral perturbation (ERSP) to provide measures of sensorimotor activity across time that can be referenced to infrahyoid muscle activity.<br><br>To validate further use of this non-invasive means of measuring neural responses. | 25                          | Mean age: 29          | 20/5        | <b>Task 1: Visually cued self-administered 5ml water swallowing</b><br><br>Task 2: Tongue tapping                                                                                     | 80<br><br>80           | Time frequency domain ERS and ERD from Mu rythm                                                                                                                                                                                                                                                                              | Swallowing execution evokes bilateral Mu ERD rythm localised in BA4 and BA6 with right lateralization and can be mesured in a [0ms:2000ms] time window in α and β bands                                                                                                                                                           | C3<br>C4<br>Cz                              | BA4<br>BA6                                    | Precentral gyrus<br>PMC<br>with independent component analysis                                         |

| Supplementary Table S2 (Continued) |                                 |                    |                                                                                                                                                                                                  |                             |                                              |             |                                                                |                     |                                                   |                         |    |                                                                                        |                                                                                                                                                                                                                                                                                                                                   |                    |                                             |                                               |                                                |  |  |
|------------------------------------|---------------------------------|--------------------|--------------------------------------------------------------------------------------------------------------------------------------------------------------------------------------------------|-----------------------------|----------------------------------------------|-------------|----------------------------------------------------------------|---------------------|---------------------------------------------------|-------------------------|----|----------------------------------------------------------------------------------------|-----------------------------------------------------------------------------------------------------------------------------------------------------------------------------------------------------------------------------------------------------------------------------------------------------------------------------------|--------------------|---------------------------------------------|-----------------------------------------------|------------------------------------------------|--|--|
| EEG Reference                      | QualSyst score (%) <sup>b</sup> | NHMRC <sup>c</sup> | Objectives                                                                                                                                                                                       | Number of subjects analyzed | Age                                          | Female/Male | Tasks and/or conditions (bold: eligible for the review)        |                     |                                                   |                         |    | Number of trials                                                                       | Measure                                                                                                                                                                                                                                                                                                                           | Review conclusions | Locus of interest 10-10 system <sup>a</sup> | Locus of interest Brodmann Areas <sup>a</sup> | Locus of interest Anatomical gyri <sup>a</sup> |  |  |
| Adaptive physiology                |                                 |                    |                                                                                                                                                                                                  |                             |                                              |             |                                                                |                     |                                                   |                         |    |                                                                                        |                                                                                                                                                                                                                                                                                                                                   |                    |                                             |                                               |                                                |  |  |
| Jestrović 2014 [16]                | 20/24 (83%) Strong              | IV                 | To investigate the stationarity of the EEG signal during swallowing and the effect of sex, age, different brain regions, and the viscosity of the swallowed liquids.                             | 55                          | Age range: 18-65                             | 27/28       | Task 1: Self-paced                                             | Saliva              | swallowing                                        |                         | 5  | Stationarity (Distance between local and global spectra) and Index of non-stationarity | Whole head EEG shows that swallowing signal is non-stationnary and needs specific methods to be studied. INS increase with viscosity and is the highest with saliva (p<0.01). Male participants exhibited higher non-stationarity (p<0.01), except for water swallows.                                                            | na                 | na                                          | na                                            |                                                |  |  |
|                                    |                                 |                    |                                                                                                                                                                                                  |                             |                                              |             | Task 2: Self-paced water (1cp)                                 | swallowing from cup |                                                   |                         | 5  |                                                                                        |                                                                                                                                                                                                                                                                                                                                   |                    |                                             |                                               |                                                |  |  |
|                                    |                                 |                    |                                                                                                                                                                                                  |                             |                                              |             | Task 3: Self-paced honey (150cP)                               | swallowing from cup |                                                   |                         | 5  |                                                                                        |                                                                                                                                                                                                                                                                                                                                   |                    |                                             |                                               |                                                |  |  |
|                                    |                                 |                    |                                                                                                                                                                                                  |                             |                                              |             | Task 4: Self-paced nectar (400cP)                              | swallowing from cup |                                                   |                         | 5  |                                                                                        |                                                                                                                                                                                                                                                                                                                                   |                    |                                             |                                               |                                                |  |  |
| Jestrović 2015 [17]                | 19/22 (86%) Strong              | IV                 | To compare the small-world properties of brain networks for swallowing in two head positions: the neutral or natural position, and the chin-tuck head position,                                  | 55                          | Age range: 18-65                             | na          | Task 1: Self-paced                                             | saliva              | swallowing                                        | neutral position        | 5  | Phase synchronization characterized by degree of the Node,                             | Neutral and chin tuck position swallowing networks display small-world characteristics and seems to differ for some features (e.g. clustering coefficient and characteristic path length). Differences are found in $\alpha$ (inhibitory cognitive and motor tasks) and $\gamma$ bands (performance of cognitive and motor tasks) | na                 | na                                          | na                                            |                                                |  |  |
|                                    |                                 |                    |                                                                                                                                                                                                  |                             |                                              |             | Task 2: Self-paced                                             | saliva              | swallowing                                        | chin-tuck head position | 5  | Clustering coefficient, Characteristic shortest path length, Local efficiency          |                                                                                                                                                                                                                                                                                                                                   |                    |                                             |                                               |                                                |  |  |
| Jestrović 2016 [18]                | 20/22 (91%) Strong              | IV                 | To compare the brain networks in term of small world properties, according to swallowing of various fluid viscosities, as well as between swallowing in the neutral and chin-tuck head positions | 55                          | Age range: 18-65<br>Mean age: 38.58 (±14.84) | na          | Task 1: Self- paced                                            | water (1cP)         | swallowing                                        |                         | 5  | Phase synchronization characterized by degree of the Node,                             | Significant differences in the brain networks in terms of clustering coefficient, characteristic path length and small-worldness depending on the bolus thickness (in $\alpha$ , $\beta$ , $\gamma$ , $\delta$ , $\theta$ bands, p<0.05) and the head position ( $\alpha$ , $\beta$ , $\gamma$ band, p<0.05)                      | na                 | na                                          | na                                            |                                                |  |  |
|                                    |                                 |                    |                                                                                                                                                                                                  |                             |                                              |             | Task 2: Self- paced                                            | nectar (150cP)      | swallowing                                        |                         | 5  | Clustering coefficient,                                                                |                                                                                                                                                                                                                                                                                                                                   |                    |                                             |                                               |                                                |  |  |
|                                    |                                 |                    |                                                                                                                                                                                                  |                             |                                              |             | Task 3: Self- paced                                            | honey (400cP)       | swallowing                                        |                         | 5  | Characteristic shortest path length,                                                   | (in $\alpha$ , $\beta$ , $\gamma$ , $\delta$ , $\theta$ bands, p<0.05) and the head position ( $\alpha$ , $\beta$ , $\gamma$ band, p<0.05)                                                                                                                                                                                        |                    |                                             |                                               |                                                |  |  |
|                                    |                                 |                    |                                                                                                                                                                                                  |                             |                                              |             | Task position A: Self- paced                                   | neutral position    | swallowing (with either aforementioned thickness) |                         | 10 | Local efficiency                                                                       | The functional brain network activated during swallowing has small-world properties.                                                                                                                                                                                                                                              |                    |                                             |                                               |                                                |  |  |
|                                    |                                 |                    |                                                                                                                                                                                                  |                             |                                              |             | Task position B: Self- paced                                   | chin-tuck position  | swallowing (with either aforementioned thickness) |                         | 10 |                                                                                        |                                                                                                                                                                                                                                                                                                                                   |                    |                                             |                                               |                                                |  |  |
|                                    |                                 |                    |                                                                                                                                                                                                  |                             |                                              |             | Every task (1, 2 ,3) was performed in both positions (A and B) |                     |                                                   |                         |    |                                                                                        |                                                                                                                                                                                                                                                                                                                                   |                    |                                             |                                               |                                                |  |  |
| Jestrović 2018 [21]                | 19/22 (86%) Strong              | IV                 | To investigate the effects of external distraction on brain activity during swallowing.                                                                                                          | 15                          | Age range: 18-35                             | 0/15        | Task 1/Condition 1: Self-paced                                 | 1ml water           | swallow without                                   | distractor              | 10 | Phase synchronization characterized by degree of the Node,                             | Significant differences in the brain networks in terms of custerling coefficient, characteristic path length and small-worldness depending on the presence of distractors and the swallowed volume (in $\alpha$ , $\beta$ , $\gamma$ , $\delta$ , $\theta$ bands, p<0.05)                                                         | na                 | na                                          | na                                            |                                                |  |  |
|                                    |                                 |                    |                                                                                                                                                                                                  |                             |                                              |             | Task 1/Condition 2: Self-paced                                 | 1ml water           | swallow with                                      | distractor              | 10 | Clustering coefficient, Characteristic shortest path length,                           |                                                                                                                                                                                                                                                                                                                                   |                    |                                             |                                               |                                                |  |  |
|                                    |                                 |                    |                                                                                                                                                                                                  |                             |                                              |             | Task 2/Condition 1: Self-paced                                 | 5ml water           | swallow without                                   | distractor              | 10 | Local efficiency                                                                       | The brain network is different for no-distraction swallowing compared with the brain network constructed during swallowing with distraction                                                                                                                                                                                       |                    |                                             |                                               |                                                |  |  |
|                                    |                                 |                    |                                                                                                                                                                                                  |                             |                                              |             | Task 2 /Condition 2: Self-paced                                | 5ml water           | swallow with                                      | distractor              | 10 |                                                                                        |                                                                                                                                                                                                                                                                                                                                   |                    |                                             |                                               |                                                |  |  |
|                                    |                                 |                    |                                                                                                                                                                                                  |                             |                                              |             | Task 3/Condition 1: Self-paced                                 | 10ml water          | swallow without                                   | distractor              | 10 |                                                                                        | These results showed differences in the swallowing of boluses of various volumes in all frequency bands of interest.                                                                                                                                                                                                              |                    |                                             |                                               |                                                |  |  |
|                                    |                                 |                    |                                                                                                                                                                                                  |                             |                                              |             | Task 3/Condition 2: Self-paced                                 | 10ml water          | swallow with                                      | distractor              | 10 |                                                                                        |                                                                                                                                                                                                                                                                                                                                   |                    |                                             |                                               |                                                |  |  |

| Supplementary Table S2 (Continued) |                                 |                    |                                                                                                                                      |                                                                                                  |                  |                                                         |                                                                     |                                                             |                                                                                                               |                                                                                           |                                                                                                                                                                                                                      |                                               |                                                |             |       |  |  |
|------------------------------------|---------------------------------|--------------------|--------------------------------------------------------------------------------------------------------------------------------------|--------------------------------------------------------------------------------------------------|------------------|---------------------------------------------------------|---------------------------------------------------------------------|-------------------------------------------------------------|---------------------------------------------------------------------------------------------------------------|-------------------------------------------------------------------------------------------|----------------------------------------------------------------------------------------------------------------------------------------------------------------------------------------------------------------------|-----------------------------------------------|------------------------------------------------|-------------|-------|--|--|
| EEG Reference                      | QualSyst score (%) <sup>b</sup> | NHMRC <sup>c</sup> | Objectives                                                                                                                           | Number of subjects analyzed                                                                      | Age              | Female/Male                                             | Tasks and/or conditions (bold: eligible for the review)             | Number of trials                                            | Measure                                                                                                       | Review conclusions                                                                        | Locus of interest 10-10 system <sup>a</sup>                                                                                                                                                                          | Locus of interest Brodmann Areas <sup>a</sup> | Locus of interest Anatomical gyri <sup>a</sup> |             |       |  |  |
| Patho-physiology                   |                                 |                    |                                                                                                                                      |                                                                                                  |                  |                                                         |                                                                     |                                                             |                                                                                                               |                                                                                           |                                                                                                                                                                                                                      |                                               |                                                |             |       |  |  |
| Yuan 2017 [20]                     | 22/26 (85%) Strong              | III2               | To investigate the effect of tDCS on swallowing apraxia and cortical activation in stroke patients                                   | 9                                                                                                | Age range:       | 5/4                                                     | Task 1: Auditory cued volitional water swallowing pre-tDCS          | 20                                                          | Signal complexity through Approximate entropy (ApEn)                                                          | Regardless of tDCS                                                                        | P3                                                                                                                                                                                                                   | BA39L                                         | Left                                           | angular     | gyrus |  |  |
|                                    |                                 |                    |                                                                                                                                      | Stroke patients                                                                                  | 48-70            | Patients: 2/1                                           | Task 2: Transasally provoked water swallowing pre-tDCS              | 20                                                          | ApEn can characterize the changes in brain function by quantifyig and measuring the regularity of the signal. | Physiology: Volitional water swallowing increases ApEn in F4, C4, P3, P4, and T5 (p<0.01) | P4                                                                                                                                                                                                                   | BA39R                                         | Right                                          | angular     | gyrus |  |  |
|                                    |                                 |                    |                                                                                                                                      | patients                                                                                         | 45-65            | Controls: 3/3                                           |                                                                     | 20                                                          | ApEn can characterize the changes in brain function by quantifyig and measuring the regularity of the signal. | Reflexive swallowing increases ApEn in C4 (p<0.01)                                        | C3                                                                                                                                                                                                                   | BA1,3,4L                                      | Left                                           | pericentral | Cx    |  |  |
|                                    |                                 |                    |                                                                                                                                      | with swallowing apraxia=3 Healthy subjects=6                                                     |                  |                                                         |                                                                     | 20                                                          |                                                                                                               | Reflexive swallowing increases ApEn in C4 (p<0.01)                                        | C4                                                                                                                                                                                                                   | BA1,3R                                        | Right                                          | postcentral | gyrus |  |  |
|                                    |                                 |                    |                                                                                                                                      |                                                                                                  |                  |                                                         |                                                                     | Task 1 post tDCS: Auditory cued water volitional swallowing | 20                                                                                                            |                                                                                           | T5                                                                                                                                                                                                                   | BA9R                                          | Right                                          | DLPFC       |       |  |  |
|                                    |                                 |                    |                                                                                                                                      |                                                                                                  |                  | Task 2 post tDCS :Transally provoked water transnasally | 20                                                                  |                                                             | Pathology: Volitional water swallowing did not modify ApEn                                                    | T5                                                                                        | BA21                                                                                                                                                                                                                 | Middle                                        | temporal                                       | gyrus       |       |  |  |
|                                    |                                 |                    |                                                                                                                                      |                                                                                                  |                  | Task 3: Rest pre-tDCS and post-tDCS                     | 2                                                                   |                                                             | Reflexive swallowing increased ApEn in left sided regions (C3, P3, T5)                                        |                                                                                           | BA37                                                                                                                                                                                                                 | Fusiform                                      | gyrus                                          |             |       |  |  |
| Pathology                          |                                 |                    |                                                                                                                                      |                                                                                                  |                  |                                                         |                                                                     |                                                             |                                                                                                               |                                                                                           |                                                                                                                                                                                                                      |                                               |                                                |             |       |  |  |
| Restrepo 2020 [22]                 | 18/24 (75%) Good                | III2               | To determine the activity of the brain cortex of children with Anterior Open Bite (AOB) at rest and during phonation and deglutition | 14                                                                                               | Age range: 10-13 | 7/7                                                     | Task 1: AOB group-10s self-paced swallowing from glass of water     | 1                                                           | Time-frequency domain: magnitude (Hertz) for each frequency                                                   | There was no difference between the two groups for the swallowing execution               | Rest : C3 C4                                                                                                                                                                                                         | Rest : BA1,3,4L                               | Pericentral Cx                                 |             |       |  |  |
|                                    |                                 |                    |                                                                                                                                      | Patients with AOB=7 Controls=7                                                                   | Mean age: 11.9   |                                                         | Task 1: Non-AOB group-10s self-paced swallowing from glass of water | 1                                                           |                                                                                                               |                                                                                           | The only difference was found during the rest task between the two groups on C3 and C4 electrodes with a higher left sided activity in the AOB group in $\alpha/\theta$ band (p=0.05) and on $\alpha$ band (p=0.02). |                                               |                                                |             |       |  |  |
|                                    |                                 |                    |                                                                                                                                      |                                                                                                  |                  |                                                         | Task 2: AOB group-50s phonation task                                | 1                                                           |                                                                                                               |                                                                                           |                                                                                                                                                                                                                      |                                               |                                                |             |       |  |  |
|                                    |                                 |                    |                                                                                                                                      |                                                                                                  |                  |                                                         | Task 2: Non-AOB group-50s phonation task                            | 1                                                           |                                                                                                               |                                                                                           |                                                                                                                                                                                                                      |                                               |                                                |             |       |  |  |
|                                    |                                 |                    |                                                                                                                                      |                                                                                                  |                  |                                                         | Task 3: AOB group- Rest                                             | 1                                                           |                                                                                                               |                                                                                           |                                                                                                                                                                                                                      |                                               |                                                |             |       |  |  |
|                                    |                                 |                    |                                                                                                                                      |                                                                                                  |                  | Task 3: Non-AOB group- Rest                             | 1                                                                   |                                                             |                                                                                                               |                                                                                           |                                                                                                                                                                                                                      |                                               |                                                |             |       |  |  |
| AOB: Anterior open bite            |                                 |                    |                                                                                                                                      | Cx: Cortex                                                                                       |                  |                                                         |                                                                     | M1: Primary motor cortex                                    |                                                                                                               |                                                                                           |                                                                                                                                                                                                                      | PFC: Prefrontal cortex                        |                                                |             |       |  |  |
| BA: Brodmann area                  |                                 |                    |                                                                                                                                      | MRCP : Movement correlated cortical potential, contains Bereischaftspotential and Negative slope |                  |                                                         |                                                                     | Na: not available                                           |                                                                                                               |                                                                                           |                                                                                                                                                                                                                      | PMC: Premotor cortex                          |                                                |             |       |  |  |
| BP: Bereitschaftspotential         |                                 |                    |                                                                                                                                      |                                                                                                  |                  |                                                         |                                                                     | NF: Neurofeedback                                           |                                                                                                               |                                                                                           |                                                                                                                                                                                                                      | R/L: Right/Left                               |                                                |             |       |  |  |
| CNV: Contingent Negative Variation |                                 |                    |                                                                                                                                      |                                                                                                  |                  |                                                         |                                                                     | NS: non significative                                       |                                                                                                               |                                                                                           |                                                                                                                                                                                                                      | SE: Standard error                            |                                                |             |       |  |  |
|                                    |                                 |                    |                                                                                                                                      |                                                                                                  |                  |                                                         |                                                                     |                                                             |                                                                                                               |                                                                                           |                                                                                                                                                                                                                      | SMA: Supplementary motor area                 |                                                |             |       |  |  |
|                                    |                                 |                    |                                                                                                                                      |                                                                                                  |                  |                                                         |                                                                     |                                                             |                                                                                                               |                                                                                           |                                                                                                                                                                                                                      | S1: Primary sensory motor cortex              |                                                |             |       |  |  |
|                                    |                                 |                    |                                                                                                                                      |                                                                                                  |                  |                                                         |                                                                     |                                                             |                                                                                                               |                                                                                           |                                                                                                                                                                                                                      | tDCS: Transcranial Direct-Current Stimulation |                                                |             |       |  |  |
|                                    |                                 |                    |                                                                                                                                      |                                                                                                  |                  |                                                         |                                                                     |                                                             |                                                                                                               |                                                                                           |                                                                                                                                                                                                                      | ±: Standard deviation                         |                                                |             |       |  |  |

Bold text in objectives and tasks reflects the parts included in our review.

a.Correspondance between 10-10 system, Brodman areas and anatomical gyri were performed according to the article data but also Scrivener and Reader 2022 [79], Okamoto 2004 [80] and <http://bioimagesuite.com> (based on Lacadie et al. 2008 [81]) when coordinates were available.

b. QualSyst score: Quality score from Kmet et al.[11].

c. NHMRC: National Health and Medical Research Council level of evidence. Level I, systematic reviews; level II, randomized control trials; level III-1, pseudo-randomized control trials; level III-2, comparative studies with concurrent controls and allocation not randomized (cohort studies), case control studies, or interrupted time series with a control group; level III-3, comparative studies with historical control, two or more single-arm studies, or interrupted time series without a control group; level IV, case series.

Supplementary Table S3. fNIRS studies data.

| fNIRS Reference     | QualSyst score (%) <sup>b</sup> | NHMRC <sup>c</sup> | Objectives                                                                                                                                                                                                                                          | Number of subjects analyzed | Age                              | Female/Male       | Tasks and/or conditions (bold: eligible for the review)                                                                                                       | Number of trials | Measure                                                                                                                               | Review conclusions                                                                                                                                                                                                                                                                                                                                                                                                                                                                                                                                                                                                                                                                                                                                                                                                                                                                    | Locus of interest 10-10 system <sup>a</sup>                     | Locus of interest Brodmann Areas <sup>a</sup>                          | Locus of interest Anatomical gyri <sup>a</sup>                                                                                                                          |
|---------------------|---------------------------------|--------------------|-----------------------------------------------------------------------------------------------------------------------------------------------------------------------------------------------------------------------------------------------------|-----------------------------|----------------------------------|-------------------|---------------------------------------------------------------------------------------------------------------------------------------------------------------|------------------|---------------------------------------------------------------------------------------------------------------------------------------|---------------------------------------------------------------------------------------------------------------------------------------------------------------------------------------------------------------------------------------------------------------------------------------------------------------------------------------------------------------------------------------------------------------------------------------------------------------------------------------------------------------------------------------------------------------------------------------------------------------------------------------------------------------------------------------------------------------------------------------------------------------------------------------------------------------------------------------------------------------------------------------|-----------------------------------------------------------------|------------------------------------------------------------------------|-------------------------------------------------------------------------------------------------------------------------------------------------------------------------|
| Physiology          |                                 |                    |                                                                                                                                                                                                                                                     |                             |                                  |                   |                                                                                                                                                               |                  |                                                                                                                                       |                                                                                                                                                                                                                                                                                                                                                                                                                                                                                                                                                                                                                                                                                                                                                                                                                                                                                       |                                                                 |                                                                        |                                                                                                                                                                         |
| Kober 2014 [44]     | 20/22 (91%)<br>Strong           | IV                 | To examine cortical correlates of motor execution and imagery of swallowing using NIRS.                                                                                                                                                             | 14 healthy                  | Mean age: 31.86                  | 7/7               | <b>Task 1: Self-paced volitional 5-6 water swallowing through oral tube</b>                                                                                   | 20               | OxyHb and DeoxyHb mean relative concentration amplitude                                                                               | Swallowing activity localised in the bilateral inferior frontal gyri, measured within a [0ms:+25000ms] time window (p<0.05)                                                                                                                                                                                                                                                                                                                                                                                                                                                                                                                                                                                                                                                                                                                                                           | T3, T4, FC5, FC6, FT7, FT8                                      | BA 22<br>BA 44                                                         | Inferior frontal gyrus<br>Pars opercularis                                                                                                                              |
| Inamoto 2015 [47]   | 17/22 (77%)<br>Good             | IV                 | To examine cerebral blood volume dynamics during volitional swallowing using multi-channel fNIRS<br><br>To identify the specific regions of the cerebral cortex that exhibited activation.                                                          | 15 healthy                  | Mean age: 26.5 (±1.3)            | age: 26.5<br>3/12 | <b>Task: Orally cued 5ml water swallowing</b>                                                                                                                 | 10               | OxyHb relative concentration mean amplitude from [+5s after end of task:+10s]                                                         | Using the OxyHb concentration changes, it is possible to visualize the swallowing cortical evoked CBF in the posterior frontal region and its surroundings (p<0.05)                                                                                                                                                                                                                                                                                                                                                                                                                                                                                                                                                                                                                                                                                                                   | C4, C4, T4,T3<br>T4,T3<br>F3,F7<br>F8,F7<br>P4,P3               | C3<br>C3<br><br>BA4,1<br>BA3<br>BA22<br>BA21<br>BA9,45<br>BA47<br>BA40 | Precentral gyrus<br>Postcentral gyrus<br>Superior temporal gyrus<br>Middle temporal gyrus<br>Left middle frontal gyrus<br>Inferior frontal gyrus<br>Supramarginal gyrus |
| Kamarunas 2018 [50] | 23/24 (96%)<br>Strong           | IV                 | To determine the timing and amplitude characteristics of cortical activation patterns in the right and left precentral motor and postcentral somatosensory regions during spontaneous reflexive saliva swallows using fNIRS.                        | 14 healthy                  | Age range: 28-59<br>Mean age: 44 | 7/7               | <b>Task: Spontaneous swallowing during rest without instruction</b>                                                                                           | 12               | OxyHb and DeoxyHb relative concentration Z-score zmplitude, onset time and peak time<br>-Early HDR at [-5:8s]<br>-Late HDR at [8:35s] | In the four region, the mean peak times are situated during the [3-4s] interval (early response) and during the [13-22.5s] interval (late response). Spontaneous uncued swallowing evokes an early cortical response peak during the [0:8s] period. Left S1 response was the earliest at onset (-2s, p<0.008) with stronger responses. This response is non-significantly followed by responses of right M1, right S1 and last left M1. Spontaneous uncued swallowing evokes a late cortical response [8-35s]. Time course across the regions was not significant for the late peak. The strongest HbO2 change were found in left S1 in comparison to left M1 (p<0.005) regions during the early peak The four regions’ activity seems independent, as activity correlations were unsufficient with strongest correlations between left S1 and right M1 (r=0.63) and both M1 (r=0.63) | C4,C3<br>C4,C3                                                  | BA4 (BA44 in MNI <sup>d</sup> )<br>BA1                                 | Precentral gyrus (M1)<br>Postcentral gyrus (S1)                                                                                                                         |
| Kober 2018 [51]     | 21/22 (95%)<br>Strong           | IV                 | To investigate whether NIRS is sensitive enough to reveal differences in the hemodynamic response over the bilateral IFG between swallowing saliva and water in healthy adults.<br><br>To compare the hemodynamic response over the two hemispheres | 16 healthy                  | Mean age: 23.81 (SE=±0.53)       | 8/8               | <b>Task 1: Self-paced volitional 5 to 6 water swallowing through oral tube</b><br><br><b>Task 2: Self-paced volitional 5 to 6 saliva swallowing</b>           | 20<br><br>20     | OxyHb and DeoxyHb mean relative concentration amplitude and shape                                                                     | Strongest swallowing evoked response is located bilateraly in the inferior frontal region in pars opercularis (False discovery rate, p<0.10)<br>Differences between water and saliva with higher oxyHb responses for saliva (p<0.05)                                                                                                                                                                                                                                                                                                                                                                                                                                                                                                                                                                                                                                                  | FC5, FC6, FT7, FT8<br>F7,F8                                     | BA 44<br>BA 45                                                         | Inferior frontal gyrus<br>Pars opercularis                                                                                                                              |
| Matsuo 2021 [54]    | 17/22 (77%)<br>Good             | IV                 | To investigate the cerebral hemodynamics associated with the MI and ME of a self-feeding activity with chopsticks                                                                                                                                   | 21 healthy                  | Mean age: 29.4 (±10.2)           | “14F and 7F”?     | <b>Task 1: Stopwatch-cued volitional cucumber eating with chopsticks</b><br><br>Task 2: Assistant orally-cued motor imagery of cucumber eating ith chopsticks | 3<br><br>3       | OxyHb mean (5-second moving average with integral mode) relative concentration Z-score amplitude over inferior frontal gyrus          | Swallowing execution evokes a typical oxyHb HDR in SMC, PFC and pre-SMA and a oxyHb decrease in SMA and PMA between [5:25s] after onset (p<0.05)                                                                                                                                                                                                                                                                                                                                                                                                                                                                                                                                                                                                                                                                                                                                      | FC3,FC4,FC5,FC6<br>F1,F2,FC1,FC2,FCz<br>C3, C4<br>Fp1,Fp2,F3,F4 | BA6 lateral<br>BA6 medial<br>BA1, 4, 3<br>BA9, 10                      | PMC<br>Pre-SMA, Sensorimotor PFC<br><br>SMA<br>Cx                                                                                                                       |

Supplementary Table S3 (Continued).

| fNIRS Reference     | QualSyst score (%) <sup>b</sup> | NHMRC <sup>c</sup> | Objectives                                                                                                                                                                                                                                                                                                                                                                                                                                                                                                                                                                                                                        | Number of subjects analyzed | Age                              | Female/Male       | Tasks and/or conditions (bold: eligible for the review)                                                                                                                                                                                                                                                                                                                                                                                                                                                      | Number of trials           | Measure                                                                                                           | Review conclusions                                                                                                                                                                                                                                                                                                                                                                                                                                                                   | Locus of interest 10-10 system <sup>a</sup>               | Locus of interest Brodmann Areas <sup>a</sup> | Locus of interest Anatomical gyri <sup>a</sup>         |
|---------------------|---------------------------------|--------------------|-----------------------------------------------------------------------------------------------------------------------------------------------------------------------------------------------------------------------------------------------------------------------------------------------------------------------------------------------------------------------------------------------------------------------------------------------------------------------------------------------------------------------------------------------------------------------------------------------------------------------------------|-----------------------------|----------------------------------|-------------------|--------------------------------------------------------------------------------------------------------------------------------------------------------------------------------------------------------------------------------------------------------------------------------------------------------------------------------------------------------------------------------------------------------------------------------------------------------------------------------------------------------------|----------------------------|-------------------------------------------------------------------------------------------------------------------|--------------------------------------------------------------------------------------------------------------------------------------------------------------------------------------------------------------------------------------------------------------------------------------------------------------------------------------------------------------------------------------------------------------------------------------------------------------------------------------|-----------------------------------------------------------|-----------------------------------------------|--------------------------------------------------------|
| Adaptive physiology |                                 |                    |                                                                                                                                                                                                                                                                                                                                                                                                                                                                                                                                                                                                                                   |                             |                                  |                   |                                                                                                                                                                                                                                                                                                                                                                                                                                                                                                              |                            |                                                                                                                   |                                                                                                                                                                                                                                                                                                                                                                                                                                                                                      |                                                           |                                               |                                                        |
| Kober 2015 [46]     | 23/28 (82%)                     | IV                 | To address the question whether both hemodynamic parameters of fNIRS, oxy- and deoxy-Hb, can be modulated voluntarily by means of real-time neuro-feedback (NF), when participants imagine swallowing.<br><br><b>To study the effects of NIRS-based NF training on swallowing related brain activation patterns, measuring the cortical correlates of ME and MI of swallowing before and after NF training.</b>                                                                                                                                                                                                                   | 20 healthy                  | Mean age: 31.86                  |                   | <b>Task 1: Before NF Self-paced volitional 5 to 6 water swallowing through oral tube before NF</b>                                                                                                                                                                                                                                                                                                                                                                                                           | 20                         | OxyHb and DeoxyHb mean relative concentration amplitude                                                           | Strongest swallowing evoked response is located bilaterally in the inferior frontal region and measured in a [0ms:+25000ms] time window (p<0.01)<br>This response can be enhanced after deoxyHb Neurofeedback (p<0.05)                                                                                                                                                                                                                                                               | FC5, FC6, FT7, FT8 T4,T3 T4, FT7, FT8 F1,FC1,FC3,FC5, FCz | BA 44 BA 45 BA 22 BA 6L                       | Inferior frontal gyrus                                 |
| Mulheren 2016 [48]  | 22/22 (100%)                    | IV                 | <b>To determine whether swallowing function and hemodynamic responses differ in response to different tastes (sour and/or sweet) with mediation by genetic taster status.</b><br><br>To study the effect of the presence/absence of a supplemental slow, steady water infusion on both swallowing pace and hemodynamic responses of the primary motor cortex                                                                                                                                                                                                                                                                      | 13 healthy (2 excl.)        | Age range: 20-55<br>Mean age: 29 | 11/4 (2 excluded) | <b>Task 1: Self-paced swallowing 3ml bolus medium sour</b><br><br><b>Task 2: Self-paced swallowing 3ml bolus strong sweet</b><br><br><b>Task 3: Self-paced swallowing 3ml bolus deionizes water</b><br><br><b>Task 4: Self-paced swallowing 3ml bolus sour+water infusion (0.08 l/min) swallowing</b><br><br><b>Task 5: Self-paced swallowing 3ml bolus deionized+water infusion (0.08 l/min) swallowing</b>                                                                                                 | 30<br>30<br>30<br>30<br>30 | OxyHb relative concentration Z-score amplitude and timing<br>-“Swallow” HDR at [2-7s]<br>-“Taste” HDR at [17-22s] | Swallowing evoked an early activity peak between [2-7s] in M1, S1 and SMA that is not influenced by the taste (p<0.05)<br><br>Swallowing evoked a late activity [17-22s]influenced by the taste, the highest activity being obtained with sour taste (p<0.05)<br><br>The oxyHb of the bilateral M1, S1 and SMA were similar during the early peak<br><br>During the late peak, oxyHb was significantly greater in M1 and in S1, but was similar in SMA and the dummy region (p<0.05) | C4,C3 C4,C3 F1,F2,FC1,FC2,FC3, FC4,FT8,FT9,Fz             | BA4 (BA44 in MNI <sup>d</sup> ) BA1 BA6       | Precentral gyrus (M1)<br>Postcentral gyrus (S1)<br>SMA |
| Mulheren 2017 [49]  | 22/24 (92%)                     | III2               | <b>To study the effects of different cervical vibrations protocols</b> (different frequencies, either continuous or pulsed) on:<br>-the fundamental frequency of the voice during stimulation in comparison with voicing without stimulation.<br>-the regulation of brain stem control of swallowing through the swallowing frequency.<br><b>-the cortical swallowing network on fNIRS recordings during stimulation epochs</b><br><br><b>To compare the cortical effects of vibratory stimulation during stimulation or between stimulation periods during 20-min stimulation conditions in comparison with sham conditions.</b> | 8 healthy                   | Mean age: 45.5                   | 5/3               | <b>Condition 1: Spontaneous Swallowing during 10s cervical vibratory stimulation (8 different frequency conditions) 0-30s without instruction</b><br><br><b>Condition 2: Spontaneous Swallowing after 10s cervical vibratory stimulation (8 different frequency conditions) 30-45s without instruction</b><br><br><b>Condition 3: Spontaneous Swallowing during sham stimulation 0-30s without instruction</b><br><br>Condition 4: Control cortical activity during 10s vibration (regardless of swallowing) | 30<br>30<br>30<br>30       | OxyHb relative concentration Z-score mean amplitude and timing<br>-Early HDR at [4-7s]<br>-Late HDR at [14-17s]   | Early HDR [4:7s] detected in both M1 and S1 and late activity [14:17s]<br>Activity increased in both early and late response with vibrations compared to sham, with varying lateralization p<0.05                                                                                                                                                                                                                                                                                    | C4,C3 C4,C3                                               | BA4 (BA44 in MNI <sup>d</sup> ) BA1           | Precentral gyrus (M1)<br>Postcentral gyrus (S1)        |

Supplementary Table S3 (Continued).

| fNIRS Reference     | QualSyst score (%) <sup>b</sup> | NHMRC <sup>c</sup> | Objectives                                                                                                                                                                                                                                                                                                                                                                                                                                                                                                                              | Number of subjects analyzed                                                                     | Age                                                                         | Female/Male                           | Tasks and/or conditions (bold: eligible for the review)                                                                                                                                                                                                                                                                                                                                                                                                                                                                                                       | Number of trials                           | Measure                                                                              | Review conclusions                                                                                                                                                                                                                                                                                                                                                            | Locus of interest 10-10 system <sup>a</sup> | Locus of interest Brodmann Areas <sup>a</sup> | Locus of interest Anatomical gyri <sup>a</sup>     |                           |
|---------------------|---------------------------------|--------------------|-----------------------------------------------------------------------------------------------------------------------------------------------------------------------------------------------------------------------------------------------------------------------------------------------------------------------------------------------------------------------------------------------------------------------------------------------------------------------------------------------------------------------------------------|-------------------------------------------------------------------------------------------------|-----------------------------------------------------------------------------|---------------------------------------|---------------------------------------------------------------------------------------------------------------------------------------------------------------------------------------------------------------------------------------------------------------------------------------------------------------------------------------------------------------------------------------------------------------------------------------------------------------------------------------------------------------------------------------------------------------|--------------------------------------------|--------------------------------------------------------------------------------------|-------------------------------------------------------------------------------------------------------------------------------------------------------------------------------------------------------------------------------------------------------------------------------------------------------------------------------------------------------------------------------|---------------------------------------------|-----------------------------------------------|----------------------------------------------------|---------------------------|
| Adaptive physiology |                                 |                    |                                                                                                                                                                                                                                                                                                                                                                                                                                                                                                                                         |                                                                                                 |                                                                             |                                       |                                                                                                                                                                                                                                                                                                                                                                                                                                                                                                                                                               |                                            |                                                                                      |                                                                                                                                                                                                                                                                                                                                                                               |                                             |                                               |                                                    |                           |
| Kober 2019 [53]     | 24/28 (86%) Strong              | III2               | To compare the trainability of hemodynamic parameters between healthy young and older individuals within one neurofeedback training session.<br><br><b>To investigate if NIRS signal change during executing and imagining swallowing movements is comparable between young and older individuals when no real-time feedback of brain signals is provided.</b>                                                                                                                                                                          | 43 healthy Young : 24 Older : 19                                                                | Age range: 21-28 Older: 60-84<br>Mean Young: 23.5 Older: 68                 | 29/14                                 | <b>Task 1: Young group - Self-paced volitional 5 to 6 saliva swallowing before NF</b><br><br><b>Task 1: Older group - Self-paced volitional 5 to 6 saliva swallowing before NF</b><br><br>Task 2: Young group - Self-paced motor imagery of 5 to 6 saliva swallowing before NF<br><br>Task 2: Older group - Self-paced motor imagery of 5 to 6 saliva swallowing before NF                                                                                                                                                                                    | 10<br><br>10<br><br>10                     | OxyHb or deoxyHb mean relative concentration amplitude of inferior frontal gyrus     | During the swallowing task oxyHb was significantly greater on the left IFG than on the right IFG in the 2 groups (p<0.05).<br><br><br>No significant difference between young and older subjects (slightly stronger response in youngs)                                                                                                                                       | FC5, FC6, FT7, FT8<br>F7,F8                 | BA 44<br>BA 45                                | Inferior frontal<br>Pars opercularis               | gyrus                     |
| Patho-physiology    |                                 |                    |                                                                                                                                                                                                                                                                                                                                                                                                                                                                                                                                         |                                                                                                 |                                                                             |                                       |                                                                                                                                                                                                                                                                                                                                                                                                                                                                                                                                                               |                                            |                                                                                      |                                                                                                                                                                                                                                                                                                                                                                               |                                             |                                               |                                                    |                           |
| Lee 2018 [52]       | 20/22 (91%) Strong              | III3               | <b>To investigate prefrontal cortex activity using NIRS, in healthy volunteers and dysphagia patients during swallowing of sweetened/unsweetened and flavored/unflavored jelly</b><br><br><b>To determine if taste and flavor stimuli modulate prefrontal cortex function in dysphagia patients.</b>                                                                                                                                                                                                                                    | 12 Brain impaired dysph.: 5 Controls: 7 (±6.6)                                                  | Age Patients: 66-85 Controls: 79-94<br>Mean age: 75.3 Controls: 85.8 (±6.2) | 8/4<br>Patients: 4/1<br>Controls: 4/3 | <b>Task 1: Self-paced swallowing of unflavoured/unsweetened 2ml jelly by straw</b><br><br><b>Task 2: Self-paced swallowing of unflavoured/sweetened 2ml jelly by straw</b><br><br><b>Task 3: Self-paced swallowing of flavoured/unsweetened 2ml jelly by straw</b><br><br><b>Task 4: Self-paced swallowing of flavoured/sweetened 2ml jelly by straw</b>                                                                                                                                                                                                      | 3<br><br>3<br><br>3<br><br>3               | OxyHb relative concentration Z-score amplitude and timing<br>-Early HDR<br>-Late HDR | In healthy subjects<br>-An early prefrontal oxyHb response to swallowing is measured at about 10s<br>-A late peak is seen at about 26s<br>-Sweetness decreases the responses (p<0.001); flavor increases the response (p<0.001).<br><br>No peak in dysphagic subjects.<br><br>Comparing both groups responses, unsweetened jelly evoked higher responses in controls (p<0.01) | Fpz, Fp1,Fp2, F3, F4                        | BA9, 10                                       | Prefrontal frontal gyrus, (Superior frontal gyrus) | Cx (Medial frontal gyrus) |
| Pathology           |                                 |                    |                                                                                                                                                                                                                                                                                                                                                                                                                                                                                                                                         |                                                                                                 |                                                                             |                                       |                                                                                                                                                                                                                                                                                                                                                                                                                                                                                                                                                               |                                            |                                                                                      |                                                                                                                                                                                                                                                                                                                                                                               |                                             |                                               |                                                    |                           |
| Kober 2015 [45]     | 17/22 (77%) Good                | III3               | <b>To use NIRS to examine the cortical correlates of swallowing in patients with dysphagia. To compare the brain activation patterns associated with saliva swallowing between dysphagia patients and healthy-matched controls, in terms of time course and topographical distribution of the hemodynamic signal change (oxy-Hb and deoxy-Hb) during swallowing.</b><br><br>To determine the extent to which Motor imagery (MI) and Motor Execution (ME) of swallowing lead to comparable brain activation patterns in stroke patients. | 6 Brainstem stroke (R and L): 2 Cerebral stroke (R and R): 2 Gender and age-matched controls: 2 | Age Patients : 68-80 Controls : 64-67                                       | 4/2 Patients: 3/1 Controls: 1/1       | <b>Task 1: Self-paced volitional saliva swallowing 3 times - Controls</b><br><br><b>Task 1: Self-paced volitional saliva swallowing 3 times - Cerebral stroke patients</b><br><br><b>Task 1: Self-paced volitional saliva swallowing 3 times - Brainstem stroke patients</b><br><br>Task 2: Self-paced motor imagery of saliva swallowing 3 times - Controls<br><br>Task 2: Self-paced motor imagery of saliva swallowing 3 times - Cerebral stroke patients<br><br>Task 2: Self-paced motor imagery of saliva swallowing 3 times - Brainstem stroke patients | 10<br><br>10<br><br>10<br><br>10<br><br>10 | OxyHb and DeoxyHb mean relative concentration amplitude and onset time               | The strongest swallowing activity is localised in the bilateral inferior frontal gyri (p<0.1), measured within a [0ms:+20000ms] time window with peak at 15s<br><br>Cerebral stroke patients show less activation than controls with later peak (p<0.1)<br><br>Brainstem stroke patients show stronger activation than controls with larger region of activity (p<0.1)        | FC5, FC6, FT7, FT8<br>F7,F8<br>F7,F8        | BA 44<br>BA 45<br>BA 47                       | Inferior frontal<br>Pars opercularis               | gyrus                     |

BA: Brodmann area  
Cx: Cortex  
Dysph. : Dysphagic

Excl. : excluded  
M1 : Primary motor cortex  
Na: not available

NF : Neurofeedback  
NS: non significative  
PFC: Prefrontal cortex

PMC : Premotor cortex  
R/L: Right/Left  
SE: Standard error

SMA : Supplementary motor area  
S1 : Primary sensory motor cortex  
±: Standard deviation

a. Correspondance between 10-10 system, Brodman areas and anatomical gyri were performed according to the article data but also Scrivener and Reader 2022 [79], Okamoto 2004 [80] and <http://bioimagesuite.com> (based on Lacadie et al. 2008 [81]) when coordinates were available.

b. QualSyst score: Quality score from Kmet et al.[11].

c. NHMRC: National Health and Medical Research Council level of evidence. Level I, systematic reviews; level II, randomized control trials; level III-1, pseudo-randomized control trials; level III-2, comparative studies with concurrent controls and allocation not randomized (cohort studies), case control studies, or interrupted time series with a control group; level III-3, comparative studies with historical control, two or more single-arm studies, or interrupted time series without a control group; level IV, case series.

d. According to Bioimage Suite based on Lacadie et al. 2008 [81]. Bold text in objectives and tasks reflects the parts included in our review.

Supplementary Table S4. MEG studies data.

| MEG Reference      | QualSyst score(%) <sup>b</sup> | NHMRC <sup>c</sup> | Objectives                                                                                                                                                                                  | Number of subjects analyzed | Age                       | Female/Male | Tasks and/or conditions (bold: eligible for the review)                                       |  |  |  | Number of trials | Measure                                                                                                                                                                                 | Review conclusions                                                                                                                                                                                                                                                                                   |                           | Locus of interest 10-10 system <sup>a</sup> | Locus of interest Brodmann Areas <sup>a</sup>                                           | Locus of interest Anatomical gyri <sup>a</sup> |
|--------------------|--------------------------------|--------------------|---------------------------------------------------------------------------------------------------------------------------------------------------------------------------------------------|-----------------------------|---------------------------|-------------|-----------------------------------------------------------------------------------------------|--|--|--|------------------|-----------------------------------------------------------------------------------------------------------------------------------------------------------------------------------------|------------------------------------------------------------------------------------------------------------------------------------------------------------------------------------------------------------------------------------------------------------------------------------------------------|---------------------------|---------------------------------------------|-----------------------------------------------------------------------------------------|------------------------------------------------|
| Physiology         |                                |                    |                                                                                                                                                                                             |                             |                           |             |                                                                                               |  |  |  |                  |                                                                                                                                                                                         |                                                                                                                                                                                                                                                                                                      |                           |                                             |                                                                                         |                                                |
| Loose 2001 [23]    | 16/22 (73%)                    | IV                 | To study the sources of activation evoked by active tongue movement employing MEG                                                                                                           | 5                           | Age range: 30-49          | 0/5         | Task 1: Self-paced 5ml water swallowing                                                       |  |  |  | 100              | Time series amplitude, dipole localization                                                                                                                                              | No cortical source found                                                                                                                                                                                                                                                                             | None                      |                                             | None                                                                                    | None                                           |
|                    | Good                           |                    | To identify the locality of the major contributors                                                                                                                                          |                             |                           |             | Task 2: Tongue protraction                                                                    |  |  |  | 100              |                                                                                                                                                                                         |                                                                                                                                                                                                                                                                                                      |                           |                                             |                                                                                         |                                                |
| Abe 2003 [24]      | 14/22 (64%)                    | IV                 | To investigate whether the decision to drink is made just before swallowing, using a 306-channel whole-head neuromagnetometer.                                                              | 3                           | Adults (age not provided) | na          | Task: Self-paced 1mL water bolus by tube                                                      |  |  |  | 50               | Time series amplitude, onset time and dipole localization                                                                                                                               | The magnetic dipole during the swallowing preparation is bilaterally located in the cingulate gyrus and SMA and is active between FC4,FT8,FT9,Fz [-1500 and -1100ms] before the volitional swallowing muscular activation.                                                                           | Na F1,F2,FC1,FC2,FC3, BA6 | BA24,32                                     | Cingulate gyrus SMA                                                                     |                                                |
| Dziewas 2003 [25]  | 18/22 (82%)                    | IV                 | To study cortical activation during volitional and reflexive water swallowing with whole-head MEG and synthetic aperture magnetometry (SAM)                                                 | 10                          | Mean age: 36 (±8.1)       | 3/7         | Task 1: Self-paced volitional 10ml/min water swallowing by oral tube                          |  |  |  | 97±13            | Time-frequency domain ERS and ERD amplitude and lateralization index                                                                                                                    | The most prominent and consistent activity (α and β ERD) is located in bilateral BA 1,2,3,4,7 in Cz, Pz                                                                                                                                                                                              | C3,C4 C1,C2BA4            | BA1,2,3                                     | Postcentral gyrus (S1) Precentral gyrus (M1)                                            |                                                |
|                    | Strong                         |                    | To compare the cortical representation of swallowing with that of a swallow-related but less complex movement task with an added tongue movement paradigm was included in the study design. |                             |                           |             | Task 2: Provoked 10ml/min water swallowing by transnasal tube with volitional tongue movement |  |  |  | 84±4             |                                                                                                                                                                                         | only left sided BA7 activity)                                                                                                                                                                                                                                                                        | F3,F4                     | BA9                                         | Parietal lobule - visuomotor Cx                                                         |                                                |
|                    |                                |                    |                                                                                                                                                                                             |                             |                           |             | Task 3: Tongue propulsion                                                                     |  |  |  | 97±8             |                                                                                                                                                                                         | Insula and frontal operculum activity (θ, low γ and high γ ERS) is specifically linked to preparation and execution of swallowing in thisF7,F8,FT7,FT8 experiment                                                                                                                                    | na                        | BA13                                        | Dorsal Dorsolateral prefrontal Cx                                                       |                                                |
|                    |                                |                    |                                                                                                                                                                                             |                             |                           |             | Task 4: Resting stage                                                                         |  |  |  | na               |                                                                                                                                                                                         | Pharyngeal reflexive θ band ERS responses are located on left sided over BA9 for preparation and BA7 for execution                                                                                                                                                                                   |                           | BA44                                        | Insula Frontal operculum                                                                |                                                |
| Watanabe 2004 [27] | 16/20 (80%)                    | IV                 | To investigate serial positional changes in the entire activity areas in the cerebral cortex with time until the initiation of swallowing movement.                                         | 8                           | Age range: 25-30          | na          | Task 1: Assistant administered cued 3ml water by tube                                         |  |  |  | 30               | Equivalent current dipole latency and duration                                                                                                                                          | Swallowing preparation evoked bilateral responses located in ACC, PCC,MFG, IFG and Insula.                                                                                                                                                                                                           | na F7,F8,FT7,FT8          | BA31, BA13                                  | 23Posterior Cingulate Cx                                                                |                                                |
|                    | Strong                         |                    | To define the spatiotemporal relations among regions of the brain involved in the central initiation of human voluntary swallowing using the MEG technique with a larger subject size.      |                             |                           |             | Task 2: Right middle finger extension                                                         |  |  |  | 30               |                                                                                                                                                                                         | The mesured sequence is PCC>SMA>ACC>SFG>MFG>IFG>Insula but only PCC and Insula had significant different onset times (p<0,003) Insula and IFG activity where more consistent for swallowing than for finger extension The swallowing activity is measurable during the [-2375ms:-1055ms] time window | na                        | BA 25, 24, 32, 33                           | Inferior frontal gyrus Anterior Cingulate Cx                                            |                                                |
| Furlong 2004 [26]  | 18/22 (82%)                    | IV                 | To use MEG to dissociate the relative cortical contributions of each of the separable components of swallowing in the sensorimotor sequence                                                 | 8                           | Age range: 26-45          | 2/6         | Task 1: Assistant administered 5ml water in mouth by tube (no swallowiing)                    |  |  |  | 20               | Grand average of time-frequency domain ERS and pattern shifting from caudal pericentral cortex ERD spectral power densityactivation to superior postcentral gyri and paracentral lobule | Swallowing execution evokes an activation C3,C4 Cz, P1,P2,Pz,                                                                                                                                                                                                                                        | C3,C4 C1,C2BA4 C3,C4BA5   | BA 3, 1, 2                                  | Postcentral gyrus Precentral gyrus Superior parietal lobule - Associated sensory cortex |                                                |
|                    | Strong                         |                    | To identify the spatio-temporal characteristics of cortical activation during swallowing.                                                                                                   |                             |                           |             | Task 2: Cued 5ml water swallowing                                                             |  |  |  | 20               |                                                                                                                                                                                         | In this study, activation (ERD) during swallowing appears more right sided                                                                                                                                                                                                                           | C5,C6,P3,P4               | BA40                                        | Supramarginal gyrus                                                                     |                                                |
|                    |                                |                    | To enhance our appreciation of the relevance of cortical regions to swallowing and provide insight into the mechanisms underlying dysphagia after cerebral injury.                          |                             |                           |             | Task 3: Cued tongue pressure                                                                  |  |  |  | 20               |                                                                                                                                                                                         |                                                                                                                                                                                                                                                                                                      |                           |                                             |                                                                                         |                                                |
|                    |                                |                    |                                                                                                                                                                                             |                             |                           |             | Task 4: Resting state                                                                         |  |  |  | 20               |                                                                                                                                                                                         |                                                                                                                                                                                                                                                                                                      |                           |                                             |                                                                                         |                                                |

Supplementary Table S4 (Continued).

| MEG Reference       | QualSyst score(%) <sup>b</sup> | NHMRC <sup>c</sup> | Objectives                                                                                                                     | Number of subjects analyzed                                                                  | Age                                                         | Female/Male                              | Tasks and/or conditions (bold: eligible for the review)                                      |          |       |           | Number of trials                                                                  | Measure                                                                                                                                                                                                                                                                                                                                                                                                                                                                           | Review conclusions | Locus of interest 10-10 system <sup>a</sup> | Locus of interest Brodmann Areas <sup>a</sup> | Locus of interest Anatomical gyri <sup>a</sup> |  |
|---------------------|--------------------------------|--------------------|--------------------------------------------------------------------------------------------------------------------------------|----------------------------------------------------------------------------------------------|-------------------------------------------------------------|------------------------------------------|----------------------------------------------------------------------------------------------|----------|-------|-----------|-----------------------------------------------------------------------------------|-----------------------------------------------------------------------------------------------------------------------------------------------------------------------------------------------------------------------------------------------------------------------------------------------------------------------------------------------------------------------------------------------------------------------------------------------------------------------------------|--------------------|---------------------------------------------|-----------------------------------------------|------------------------------------------------|--|
| Physiology          |                                |                    |                                                                                                                                |                                                                                              |                                                             |                                          |                                                                                              |          |       |           |                                                                                   |                                                                                                                                                                                                                                                                                                                                                                                                                                                                                   |                    |                                             |                                               |                                                |  |
| Dziewas 2005 [28]   | 19/22 (86%)                    | IV                 | To apply whole-head MEG in order to study the cortical processing of esophageal sensation in healthy humans                    | 9                                                                                            | Mean age: 35 (±8.4)                                         | 2/7                                      | Task 1: Self-paced volitional swallowing                                                     | 10ml/min | water | 96±12     | Time-frequency domain ERS and ERD amplitude                                       | During volitional swallowing, β and α activity is left lateralized within the primary sensorimotor cortex.                                                                                                                                                                                                                                                                                                                                                                        | C3,C4<br>Cz, C1,C2 | BA1,2,3<br>BA4                              | Postcentral gyrus                             | gyrus (S1)                                     |  |
|                     | Strong                         |                    |                                                                                                                                | Task 2: Direct esophageal stimulation                                                        | 50                                                          |                                          |                                                                                              |          |       |           |                                                                                   |                                                                                                                                                                                                                                                                                                                                                                                                                                                                                   |                    |                                             |                                               | Precentral gyrus (M1)                          |  |
| Teismann 2009 [32]  | 20/22 (91%)                    | IV                 | To investigate the temporal characteristics of human swallowing in healthy subjects by means of whole-head MEG and SAM.        | 10                                                                                           | Mean age: 35.9<br>Age range: 22-60                          | 2/8                                      | Task: Self-paced volitional swallowing by oral tube                                          | 10ml/min | water | 61.2±21.1 | Time-frequency domain ERS and ERD spectral power and lateralization index         | During the swallowing execution, the primary sensorimotor cortex α and β activity is left sided during [-400:+200ms] then is symmetric during [+200ms:+400ms] and last, right sided during [+400:+600ms] (in reference to muscle activation called M1 in the study).                                                                                                                                                                                                              | C3,C4<br>Cz, C1,C2 | BA1,2,3<br>BA4                              | Postcentral gyrus                             | gyrus (S1)                                     |  |
|                     | Strong                         |                    |                                                                                                                                |                                                                                              |                                                             |                                          |                                                                                              |          |       |           |                                                                                   |                                                                                                                                                                                                                                                                                                                                                                                                                                                                                   |                    |                                             |                                               | Precentral gyrus (M1)                          |  |
| Adaptive physiology |                                |                    |                                                                                                                                |                                                                                              |                                                             |                                          |                                                                                              |          |       |           |                                                                                   |                                                                                                                                                                                                                                                                                                                                                                                                                                                                                   |                    |                                             |                                               |                                                |  |
| Teismann 2007 [29]  | 20/24 (83%)                    | IV                 | To study cortical activity during self-paced volitional swallowing with and without topical oropharyngeal anesthesia with MEG  | 10                                                                                           | Mean age: 35.9<br>Age range: 22-60                          | 3/7                                      | Task 1: Self-paced volitional swallowing                                                     | 10ml/min | water | 60.2±21.5 | Time-frequency domain ERS and ERD spectral power density                          | During volitional swallowing, β activity is bilateral within the primary sensorimotor cortex and maximum at 300ms. Peripheral sensory suppression reduces the cortical responses, most predominantly on the left side (-35%, p<0.05) VS the right side (-28%, p<0.05) without significant lateralization                                                                                                                                                                          | C3,C4<br>Cz, C1,C2 | BA1,2,3<br>BA4                              | Postcentral gyrus                             | gyrus (S1)                                     |  |
|                     | Strong                         |                    |                                                                                                                                | To evaluate the impact of sensory input in healthy subjects.                                 |                                                             |                                          | Task 2: Self-paced volitional swallowing by oral tube after pharyngeal anesthesia            | 10ml/min | water | 52.7±20.5 |                                                                                   |                                                                                                                                                                                                                                                                                                                                                                                                                                                                                   |                    |                                             |                                               | Precentral gyrus (M1)                          |  |
| Teismann 2009 [31]  | 21/24 (88%)                    | IV                 | To study cortical activity during self-paced volitional swallowing with and without preceding thermal tactile oral stimulation | 15                                                                                           | Mean age: 30.4<br>Age range: 25-57                          | 8/7                                      | Condition 1: Self-paced volitional swallowing                                                | 10ml/min | water | 73.5      | Time-frequency domain ERS and ERD spectral power density and lateralization index | In the control condition, the primary sensorimotor cortex α and β activity is stable during [-400:0ms] then is left sided during [0:200ms] and right sided during [200:600ms]. Cold stimulation (TTOS) improves the left α and β activity (p<0.05) during the whole execution sequence with a left lateralisation through [-400ms:+600ms]. This suggests the volitional (Oral) phase seems more left sided and the reflexive phase (pharyngo-oesophageal) seems more right sided. | C3,C4<br>Cz, C1,C2 | BA1,2,3<br>BA4                              | Postcentral gyrus                             | gyrus (S1)                                     |  |
|                     | Strong                         |                    |                                                                                                                                | Condition 2: Self-paced volitional swallowing by oral tube after TTOS                        |                                                             |                                          |                                                                                              |          |       | 73.7      |                                                                                   |                                                                                                                                                                                                                                                                                                                                                                                                                                                                                   |                    |                                             |                                               | Precentral gyrus (M1)                          |  |
| Teismann 2010 [34]  | 20/22 (91%)                    | III3               | To examine with whole-head MEG and compare changes in cortical swallowing processing in young versus elderly subjects          | 18                                                                                           | Young Mean age: 3.8<br>Young=9 Age range: 22-26<br>Elders=9 | 11/7                                     | Condition 1: Young volunteers - Self-paced volitional 10ml/min water swallowing by oral tube |          |       | 66.1      | Time-frequency domain ERS and ERD spectral power density                          | In elders, broader and stronger bilateral (p<0.05) activation during preparation and execution in comparison to classical results in young subjects (BA4,3,2,1 α and β ERD bilateral symmetrical activity]                                                                                                                                                                                                                                                                        | C3,C4<br>Cz, C1,C2 | BA1,2,3<br>BA4                              | Postcentral gyrus                             | gyrus (S1)                                     |  |
|                     | Strong                         |                    |                                                                                                                                | Condition 2: Elder volunteers - Self-paced volitional 10ml/min water swallowing by oral tube |                                                             | Older: Mean age: 1.6<br>Age range: 60-85 |                                                                                              |          |       | 55.8      |                                                                                   |                                                                                                                                                                                                                                                                                                                                                                                                                                                                                   |                    |                                             |                                               | Precentral gyrus (M1)                          |  |

Supplementary Table S4 (Continued).

| MEG Reference       | QualSyst score(%) <sup>b</sup> | NHMRC <sup>c</sup> | Objectives                                                                                                                                                                                                                                                                                            | Number of subjects analyzed | Age                    | Female/Male | Tasks and/or conditions (bold: eligible for the review)                                                                                                    | Number of trials | Measure                                                                           | Review conclusions                                                                                                                                                                                                                                                                                                                                                                     | Locus of interest 10-10 system <sup>a</sup> | Locus of interest Brodmann Areas <sup>a</sup> | Locus of interest Anatomical gyri <sup>a</sup>           |
|---------------------|--------------------------------|--------------------|-------------------------------------------------------------------------------------------------------------------------------------------------------------------------------------------------------------------------------------------------------------------------------------------------------|-----------------------------|------------------------|-------------|------------------------------------------------------------------------------------------------------------------------------------------------------------|------------------|-----------------------------------------------------------------------------------|----------------------------------------------------------------------------------------------------------------------------------------------------------------------------------------------------------------------------------------------------------------------------------------------------------------------------------------------------------------------------------------|---------------------------------------------|-----------------------------------------------|----------------------------------------------------------|
| Adaptive physiology |                                |                    |                                                                                                                                                                                                                                                                                                       |                             |                        |             |                                                                                                                                                            |                  |                                                                                   |                                                                                                                                                                                                                                                                                                                                                                                        |                                             |                                               |                                                          |
| Suntrup 2013 [38]   | 27/28 (96%) Strong             | III1               | To evaluate the effect of tDCS on the swallowing network activity by applying MEG.                                                                                                                                                                                                                    | 21                          | Mean age: 26.76 (±3.4) | 11/10       | <b>Task 1: Pre-tDCS - Visually cued simple saliva swallowing - "Simple swallow task"</b>                                                                   | 40               | Time-frequency domain ERS and ERD spectral power density and lateralization index | In control condition, activity similar to previous reports. The fast swallow task after tDCS increases the pericentral activity in all bands (p=0.006). The challenged task after tDCS increases both pericentral and premotor (PMC and SMA) activity in all bands, and also the parieto-occipital α activity (p=0.007)                                                                | C3,C4 Cz, F1,F2,FC1,FC2,FC3, FC4,FT8,FT9,Fz | BA1,2,3 C1,C2BA4 BA6                          | Postcentral gyrus (S1) Precentral gyrus (M1) PMC and SMA |
|                     |                                |                    |                                                                                                                                                                                                                                                                                                       |                             |                        |             | Task 1: Post-tDCS - Visually cued simple saliva swallowing - "Simple swallow task"                                                                         | 40               |                                                                                   |                                                                                                                                                                                                                                                                                                                                                                                        |                                             |                                               |                                                          |
|                     |                                |                    |                                                                                                                                                                                                                                                                                                       |                             |                        |             | <b>Task 2: Pre-tDCS - Visually cued fast saliva swallowing - "Fast swallow task"</b>                                                                       | 40               |                                                                                   |                                                                                                                                                                                                                                                                                                                                                                                        |                                             |                                               |                                                          |
|                     |                                |                    |                                                                                                                                                                                                                                                                                                       |                             |                        |             | Task 2: Post-tDCS - Visually cued fast saliva swallowing - "Fast swallow task"                                                                             | 40               |                                                                                   |                                                                                                                                                                                                                                                                                                                                                                                        |                                             |                                               |                                                          |
|                     |                                |                    |                                                                                                                                                                                                                                                                                                       |                             |                        |             | <b>Task 3: Pre-tDCS -150ms time window-targeted saliva swallowing - "Challenged swallow task"</b>                                                          | 40               |                                                                                   |                                                                                                                                                                                                                                                                                                                                                                                        |                                             |                                               |                                                          |
|                     |                                |                    | To gain insight into the underlying mechanism of action and to link neuroplastic with behavioral changes in swallowing.                                                                                                                                                                               |                             |                        |             | Task 3: Post-tDCS - 150ms time window-targeted saliva swallowing - "Challenged swallow task"                                                               | 40               |                                                                                   |                                                                                                                                                                                                                                                                                                                                                                                        |                                             |                                               |                                                          |
|                     |                                |                    |                                                                                                                                                                                                                                                                                                       |                             |                        |             |                                                                                                                                                            |                  |                                                                                   |                                                                                                                                                                                                                                                                                                                                                                                        |                                             |                                               |                                                          |
|                     |                                |                    |                                                                                                                                                                                                                                                                                                       |                             |                        |             |                                                                                                                                                            |                  |                                                                                   |                                                                                                                                                                                                                                                                                                                                                                                        |                                             |                                               |                                                          |
|                     |                                |                    |                                                                                                                                                                                                                                                                                                       |                             |                        |             |                                                                                                                                                            |                  |                                                                                   |                                                                                                                                                                                                                                                                                                                                                                                        |                                             |                                               |                                                          |
| Suntrup 2015 [40]   | 26/28 (93%) Strong             | III1               | To contribute further knowledge on the cortical topography and frequency–specificity of activation pattern changes during the act of swallowing by taking advantage of MEG.                                                                                                                           | 14                          | Mean age: 30.3 (±4.7)  | 6/8         | <b>Condition 1: Before pharyngeal electrical or sham stimulation - Self-paced volitional 10ml/min water swallowing by oral tube</b>                        | 60 <sup>d</sup>  | Time-frequency domain ERS and ERD spectral power density                          | Control conditions (n°1, 3 and 4) displays similar results to previous reports. Right decrement during PES                                                                                                                                                                                                                                                                             | C3,C4 Cz, F1,F2,FC1,FC2,FC3, FC4,FT8,FT9,Fz | BA1,2,3 C1,C2BA4 BA6                          | Postcentral gyrus (S1) Precentral gyrus (M1) PMC and SMA |
|                     |                                |                    |                                                                                                                                                                                                                                                                                                       |                             |                        |             | <b>Condition 2: Immediately (about 6min) after pharyngeal electrical stimulation - Self-paced volitional 10ml/min water swallowing by oral tube</b>        | 60 <sup>d</sup>  |                                                                                   |                                                                                                                                                                                                                                                                                                                                                                                        |                                             |                                               |                                                          |
|                     |                                |                    |                                                                                                                                                                                                                                                                                                       |                             |                        |             | <b>Condition 3: Immediately (6min) after sham stimulation - Self-paced volitional 10ml/min water swallowing by oral tube</b>                               | 60 <sup>d</sup>  |                                                                                   |                                                                                                                                                                                                                                                                                                                                                                                        |                                             |                                               |                                                          |
|                     |                                |                    |                                                                                                                                                                                                                                                                                                       |                             |                        |             | <b>Condition 4: 40-55 min after pharyngeal electrical or sham stimulation - Self-paced volitional 10ml/min water swallowing by oral tube</b>               | 60 <sup>d</sup>  |                                                                                   |                                                                                                                                                                                                                                                                                                                                                                                        |                                             |                                               |                                                          |
|                     |                                |                    | To analyze the complete act of swallowing instead using a method allowing to explore the stimulation-induced alterations in the cortical large-scale oscillatory swallowing network beyond the pharyngeal motor cortex.                                                                               |                             |                        |             |                                                                                                                                                            |                  |                                                                                   |                                                                                                                                                                                                                                                                                                                                                                                        |                                             |                                               |                                                          |
|                     |                                |                    |                                                                                                                                                                                                                                                                                                       |                             |                        |             |                                                                                                                                                            |                  |                                                                                   |                                                                                                                                                                                                                                                                                                                                                                                        |                                             |                                               |                                                          |
|                     |                                |                    |                                                                                                                                                                                                                                                                                                       |                             |                        |             |                                                                                                                                                            |                  |                                                                                   |                                                                                                                                                                                                                                                                                                                                                                                        |                                             |                                               |                                                          |
|                     |                                |                    |                                                                                                                                                                                                                                                                                                       |                             |                        |             |                                                                                                                                                            |                  |                                                                                   |                                                                                                                                                                                                                                                                                                                                                                                        |                                             |                                               |                                                          |
|                     |                                |                    |                                                                                                                                                                                                                                                                                                       |                             |                        |             |                                                                                                                                                            |                  |                                                                                   |                                                                                                                                                                                                                                                                                                                                                                                        |                                             |                                               |                                                          |
| Muhle 2021 [42]     | 24/28 (86%) Strong             | IV                 | To investigate whether anodal tDCS (trancient Direct Current Stimulation) and PES (Pharyngeal Electrical Stimulation) can reverse the effects of experimentally induced pharyngeal hypesthesia on the cortical swallowing network using MEG, using a "virtual lesion model" based on local anesthesia | 10                          | Mean age: 29.0 (±6.8)  | 5/5         | <b>Task 1: Baseline post local anesthesia-Self-paced volitional 10ml/min water swallowing by oral tube after local pharyngeal anesthesia</b>               | ≈ 70             | Time-frequency domain ERS and ERD spectral power density                          | After pharyngeal anesthesia, beta, alpha and theta ERD are seen in pericentral cortex with maximum activity in BA6R (p=0.047)                                                                                                                                                                                                                                                          | C3,C4 Cz, F1,F2,FC1,FC2,FC3, FC4,FT8,FT9,Fz | BA1,2,3 C1,C2BA4 BA6                          | Postcentral gyrus (S1) Precentral gyrus (M1) PMC and SMA |
|                     |                                |                    |                                                                                                                                                                                                                                                                                                       |                             |                        |             | <b>Task1: A-After tDCS - Self-paced volitional 10ml/min water swallowing by oral tube after local pharyngeal anesthesia</b>                                | ≈ 70             |                                                                                   |                                                                                                                                                                                                                                                                                                                                                                                        |                                             |                                               |                                                          |
|                     |                                |                    |                                                                                                                                                                                                                                                                                                       |                             |                        |             | <b>Task 1: C- After Pharyngeal Electrical Stimulation - Self-paced volitional 10ml/min water swallowing by oral tube after local pharyngeal anesthesia</b> | ≈ 70             |                                                                                   |                                                                                                                                                                                                                                                                                                                                                                                        |                                             |                                               |                                                          |
|                     |                                |                    |                                                                                                                                                                                                                                                                                                       |                             |                        |             | Task 2: Baseline post local anesthesia-Pneumatic pharyngeal stimulation for 15min through transnasal catheter                                              | ≈ 400            |                                                                                   |                                                                                                                                                                                                                                                                                                                                                                                        |                                             |                                               |                                                          |
|                     |                                |                    |                                                                                                                                                                                                                                                                                                       |                             |                        |             | Task 2: B- After tDCS - Pneumatic pharyngeal stimulation for 15min through transnasal catheter                                                             | ≈ 400            |                                                                                   |                                                                                                                                                                                                                                                                                                                                                                                        |                                             |                                               |                                                          |
|                     |                                |                    |                                                                                                                                                                                                                                                                                                       |                             |                        |             | Task 2: D- After PES - Pneumatic pharyngeal stimulation for 15min through transnasal catheter                                                              | ≈ 400            |                                                                                   | In their peripheral sensory lesion model of dysphagia, PES as a peripheral stimulation method was able to revert the detrimental effects of reduced sensory input on central swallowing processing, whereas tDCS as a central neuromodulation technique was not. Results may have implications for therapeutic decisions depending on the nature of dysphagia in the clinical context. |                                             |                                               | Right BA6 for anesthesia                                 |
|                     |                                |                    |                                                                                                                                                                                                                                                                                                       |                             |                        |             |                                                                                                                                                            |                  |                                                                                   |                                                                                                                                                                                                                                                                                                                                                                                        |                                             |                                               |                                                          |

Supplementary Table S4 (Continued).

| MEG Reference             | QualSyst score(%) <sup>b</sup> | NHMRC <sup>c</sup> | Objectives                                                                                                                                                                                                                                                 | Number of subjects analyzed | Age                      | Female/Male | Tasks and/or conditions (bold: eligible for the review)                                                                       | Number of trials | Measure                                                                    | Review conclusions                                                                                                                                                                                                                                                                                                                                               | Locus of interest 10-10 system <sup>a</sup> | Locus of interest Brodmann Areas <sup>a</sup> | Locus of interest Anatomical gyri <sup>a</sup>           |
|---------------------------|--------------------------------|--------------------|------------------------------------------------------------------------------------------------------------------------------------------------------------------------------------------------------------------------------------------------------------|-----------------------------|--------------------------|-------------|-------------------------------------------------------------------------------------------------------------------------------|------------------|----------------------------------------------------------------------------|------------------------------------------------------------------------------------------------------------------------------------------------------------------------------------------------------------------------------------------------------------------------------------------------------------------------------------------------------------------|---------------------------------------------|-----------------------------------------------|----------------------------------------------------------|
| Adaptive physiology       |                                |                    |                                                                                                                                                                                                                                                            |                             |                          |             |                                                                                                                               |                  |                                                                            |                                                                                                                                                                                                                                                                                                                                                                  |                                             |                                               |                                                          |
| Suntrup-Krueger 2021 [43] | 20/22 (91%)                    | IV                 | To comprehensively investigate the effect of oral application of a capsaicin-containing red pepper sauce suspension on the biomechanics and neurophysiology of swallowing.                                                                                 | 10                          | Mean age: 25.7 (±4.5)    | 4/6         | Condition 1/Task 1: 5min preconditioning with pure water + 15 min Self-paced 10ml/min pure water swallowing by oral tube      | 72±18            | Time-frequency domain ERS and ERD spectral power density                   | In control condition (Condition 1/Task1), activity was similar to previous reports.                                                                                                                                                                                                                                                                              | C3,C4 Cz, F1,F2,FC1,FC2,FC3, BA6            | BA1,2,3 C1,C2BA4                              | Postcentral gyrus (S1) Precentral gyrus (M1) PMC and SMA |
|                           |                                |                    |                                                                                                                                                                                                                                                            |                             |                          |             | Condition 1/Task 2: 5min preconditioning with pure water + Challenged 10ml/min pure water swallowing by oral tube             | 40               |                                                                            | Challenging conditions (Task 2) increased α and β activity in parieto-occipital cortex                                                                                                                                                                                                                                                                           | FC4,FT8,FT9,Fz                              |                                               |                                                          |
|                           |                                |                    | To gather further information on the feasibility of capsaicin treatment for dysphagia potential desensitization due to overstimulation was evaluated and the duration and intensity of the effect were assessed by monitoring salivary SP level over time. |                             |                          |             | Condition 2/Task 1: 5min preconditioning with capsaicinoids + 15 min Self-paced 10ml/min pure water swallowing by oral tube   | 75±30            |                                                                            | Capsaicinoids had no effect on cortical MEG but had a direct peripheral effect                                                                                                                                                                                                                                                                                   |                                             |                                               |                                                          |
|                           |                                |                    |                                                                                                                                                                                                                                                            |                             |                          |             | Condition 2/Task2: 5min preconditioning with capsaicinoids + challenged 10ml/min pure water swallowing by oral tube           | 40               |                                                                            |                                                                                                                                                                                                                                                                                                                                                                  |                                             |                                               |                                                          |
|                           |                                |                    |                                                                                                                                                                                                                                                            |                             |                          |             | Condition 3/Task1: 5min preconditioning with capsaicinoids + 15 min Self-paced 10ml/min capsaicinoids swallowing by oral tube | 71±13            |                                                                            |                                                                                                                                                                                                                                                                                                                                                                  |                                             |                                               |                                                          |
|                           |                                |                    |                                                                                                                                                                                                                                                            |                             |                          |             | Condition 3/Task2: 5min preconditioning with capsaicinoids + challenged capsaicinoids 10ml/min swallowing by oral tube        | 40               |                                                                            |                                                                                                                                                                                                                                                                                                                                                                  |                                             |                                               |                                                          |
| Pathology                 |                                |                    |                                                                                                                                                                                                                                                            |                             |                          |             |                                                                                                                               |                  |                                                                            |                                                                                                                                                                                                                                                                                                                                                                  |                                             |                                               |                                                          |
| Teismann 2008 [30]        | 19/22 (86%)                    | III3               | To study the clinical and neurofunctional changes in swallowing performance and central swallowing processing during remission from botulism intoxication.                                                                                                 | 16                          | Mean age: 27.07          | 7/9         | Condition 1: Self-paced volitional 10ml/min water swallowing by oral tube - 15 healthy subjects                               | 69.3±21.4        | Time-frequency domain ERS and ERD spectral power density                   | During volitional swallowing, β activity is bilateral within the primary sensorimotor cortex with a max ERD in BA6. γ activity of the insula is linked to the swallowing frequency. Volitional reduction of the swallowing frequency reduce the activity in insula and shift na the pericentral activity to the right.                                           | C3,C4 Cz, F1,F2,FC1,FC2,FC3, BA6            | BA1,2,3 C1,C2BA4                              | Postcentral gyrus (S1) Precentral gyrus (M1) PMC and SMA |
|                           |                                |                    |                                                                                                                                                                                                                                                            | Botulism patient: 1         | Age range: 22-34         |             | Condition 2: Slow self-paced volitional 10ml/min water swallowing by oral tube - 1 healthy subject                            | 35               |                                                                            |                                                                                                                                                                                                                                                                                                                                                                  | FC4,FT8,FT9,Fz                              |                                               |                                                          |
|                           |                                |                    |                                                                                                                                                                                                                                                            | Controls: 15                |                          |             | Condition 3: Self-paced volitional 10ml/min water swallowing by oral tube - 1 botulism subject – Day 20                       | 38               |                                                                            |                                                                                                                                                                                                                                                                                                                                                                  | Pz                                          | BA7 BA13                                      | (pat.)Posterior parietal cortex Insula                   |
|                           |                                |                    |                                                                                                                                                                                                                                                            |                             |                          |             | Condition 4: Self-paced volitional 10ml/min water swallowing by oral tube - 1 botulism subject – Day 25                       | 45               |                                                                            | In the botulism patient, specific β activity of the pericentral cortex disappeared and a specific BA7 activity is observed. However, from a pathophysiological point of view, it is hard to conclude whether the modifications of the cortical activity (loss of activity) are due to Botulism cerebral lesions themselves or to swallowing frequency reduction. |                                             |                                               |                                                          |
| Dziewas 2009 [33]         | 20/22 (91%)                    | III3               | To investigate the cortical topography of volitional swallowing in patients with Kenedy disease                                                                                                                                                            | 16                          | Patients: Mean age: 53.1 | na          | Condition 1: Kenedy disease - Self-paced volitional 10ml/min water swallowing by oral tube                                    | 60 <sup>d</sup>  | Time-frequency domain ERS and ERD amplitude, time and lateralization index | In controls, during swallowing, the β activity of the primary motor cortex is focused in a small area and is left sided during the preparation then more symmetric during execution (p<0.05).                                                                                                                                                                    | C3,C4 Cz, F1,F2,FC1,FC2,FC3, BA6            | BA1,2,3 C1,C2BA4                              | Postcentral gyrus (S1) Precentral gyrus (M1) PMC and SMA |
|                           |                                |                    |                                                                                                                                                                                                                                                            | Kenedy disease patients=8   | Age range: 43-71         |             | Condition 2: Healthy controls – Self-paced volitional 10ml/min water swallowing by oral tube                                  | 60 <sup>d</sup>  |                                                                            |                                                                                                                                                                                                                                                                                                                                                                  | Pz Fpz, Fp1,Fp2, F3, F4                     | BA7 BA9,10                                    | (pat.)Posterior parietal cortex PFC                      |
|                           |                                |                    |                                                                                                                                                                                                                                                            | Age-matched controls=8      | Controls: Mean age: 44.6 |             |                                                                                                                               |                  |                                                                            | In patients, during swallowing, the β activity of the primary motor cortex is stronger and extended to PFC and posterior parietal cortex and globally right sided during preparation and execution (p<0.05)                                                                                                                                                      |                                             |                                               |                                                          |
|                           |                                |                    |                                                                                                                                                                                                                                                            |                             | Age range: 33-60         |             |                                                                                                                               |                  |                                                                            |                                                                                                                                                                                                                                                                                                                                                                  |                                             |                                               |                                                          |

Supplementary Table S4 (Continued).

| MEG Reference      | QualSyst score (%) <sup>b</sup> | NHMRC <sup>c</sup> | Objectives                                                                                                                                                                                            | Number of subjects analyzed         | Age                             | Female/Male     | Tasks and/or conditions (bold: eligible for the review)                                                          | Number of trials | Measure                                                  | Review conclusions                                                                                                                                                                                                                                            | Locus of interest 10-10 system <sup>a</sup>     | Locus of interest Brodmann Areas <sup>a</sup> | Locus of interest Anatomical gyri <sup>a</sup> |
|--------------------|---------------------------------|--------------------|-------------------------------------------------------------------------------------------------------------------------------------------------------------------------------------------------------|-------------------------------------|---------------------------------|-----------------|------------------------------------------------------------------------------------------------------------------|------------------|----------------------------------------------------------|---------------------------------------------------------------------------------------------------------------------------------------------------------------------------------------------------------------------------------------------------------------|-------------------------------------------------|-----------------------------------------------|------------------------------------------------|
| Pathology          |                                 |                    |                                                                                                                                                                                                       |                                     |                                 |                 |                                                                                                                  |                  |                                                          |                                                                                                                                                                                                                                                               |                                                 |                                               |                                                |
| Teismann 2011 [35] | 21/22 (95%)                     | III3               | To examine cortical swallowing processing in patients in this early subacute phase after stroke of the cerebrum or the brainstem and focusing on the side of the lesion.                              | 44                                  | Age range: 33-81                | 14/30           | Condition 1: Healthy controls – Self-paced volitional 10ml/min water swallowing by oral tube                     | 49.0±12.6        | Time-frequency domain ERS and ERD spectral power density | In controls, activation is similar to previous studies with β ERD in [BA4,6 +1,2,3,5,7] (p<0.05)                                                                                                                                                              | C3,C4 Cz, F1,F2,FC1,FC2,FC3, BA6 FC4,FT8,FT9,Fz | BA1,2,3 C1,C2BA4                              | Postcentral gyrus (S1)                         |
|                    |                                 |                    |                                                                                                                                                                                                       | Stroke                              | Patients: 37                    | Patients: 12/25 | Condition 2: Hemispheric stroke without dysphagia – Self-paced volitional 10ml/min water swallowing by oral tube | Right: 42.1±11.6 |                                                          |                                                                                                                                                                                                                                                               |                                                 |                                               | Precentral gyrus (M1)                          |
|                    |                                 |                    |                                                                                                                                                                                                       | Age-matched controls=7              | Mean age: 63.5(±11.8)           | Controls: 2/5   |                                                                                                                  | Left: 43.8±18.7  |                                                          |                                                                                                                                                                                                                                                               |                                                 |                                               | PMC and SMA                                    |
|                    |                                 |                    |                                                                                                                                                                                                       |                                     |                                 |                 | Condition 3: Hemispheric stroke with dysphagia – Self-paced volitional 10ml/min water swallowing by oral tube    | Right: 45.7±20.3 |                                                          |                                                                                                                                                                                                                                                               |                                                 |                                               | PFC (Pat.)                                     |
| Teismann 2011 [36] | 21/22 (95%)                     | III3               | To study cortical activity during self-paced volitional swallowing on fourteen patients suffering from sporadic ALS with bulbar onset with MEG.                                                       | 21                                  | Patients: Mean age: 58.9(±8.78) | 5/9             | Condition 1: Healthy controls - Self-paced volitional 10ml/min water swallowing by oral tube                     | 58.29            | Time-frequency domain ERS and ERD spectral power density | Healthy controls display similar results to previous reports. In ALS, the more dysphagic, the more right-lateralized is the activity, with a global reduction of the pericentral activity in comparison to controls (p<0.05). No local extension of activity. | C3,C4 Cz, F1,F2,FC1,FC2,FC3, BA6 FC4,FT8,FT9,Fz | BA1,2,3 C1,C2BA4                              | Postcentral gyrus (S1)                         |
|                    |                                 |                    |                                                                                                                                                                                                       | ALS                                 | Patients=14                     |                 | Condition 2: Mildly dysphagic patients - Self-paced volitional 10ml/min water swallowing by oral tube            | 51.29            |                                                          |                                                                                                                                                                                                                                                               |                                                 |                                               | Precentral gyrus (M1)                          |
|                    |                                 |                    |                                                                                                                                                                                                       |                                     | Age range: 44-74                |                 |                                                                                                                  |                  |                                                          |                                                                                                                                                                                                                                                               |                                                 |                                               | PMC and SMA                                    |
|                    |                                 |                    |                                                                                                                                                                                                       | Controls=7                          | Controls: Mean age: 57.6(±10.4) |                 | Condition 3: Severely dysphagic patients - Self-paced volitional 10ml/min water swallowing by oral tube          | 56.86            |                                                          |                                                                                                                                                                                                                                                               |                                                 |                                               | Right lateralisation for ALS                   |
| Suntrup 2013 [37]  | 21/22 (95%)                     | III3               | To evaluate differences in swallow-related cortical activation in dysphagic versus non-dysphagic patients with Parkinson’s disease and healthy control subjects using an established swallow paradigm | 30                                  | Mean age: 65.5(±12.6)           | Patient: 9/11   | Task: Controls - Self-paced volitional 10ml/min water swallowing by oral tube                                    |                  | Time-frequency domain ERS and ERD spectral power density | In all 3 groups: bilateral pericentral sensorimotor activation                                                                                                                                                                                                | C3,C4 Cz, F1,F2,FC1,FC2,FC3, BA6                | BA1,2,3 C1,C2BA4                              | Postcentral gyrus (S1)                         |
|                    |                                 |                    |                                                                                                                                                                                                       | Dysphagic                           | Patients: 65.5(±12.6)           | Controls: 5/5   |                                                                                                                  |                  |                                                          |                                                                                                                                                                                                                                                               |                                                 |                                               | Precentral gyrus (M1)                          |
|                    |                                 |                    |                                                                                                                                                                                                       | Parkinson                           | Controls: 66.3(±12.4)           |                 | Task: Non-dysphagic parkinson - Self-paced volitional 10ml/min water swallowing by oral tube                     |                  |                                                          |                                                                                                                                                                                                                                                               |                                                 |                                               | PMC and SMA                                    |
|                    |                                 |                    |                                                                                                                                                                                                       | Non-dysphagic Parkinson patients=10 |                                 |                 |                                                                                                                  |                  |                                                          |                                                                                                                                                                                                                                                               |                                                 |                                               | Lateral parietal Cx (pat.)                     |
| Suntrup 2013 [37]  | 21/22 (95%)                     | III3               | To evaluate differences in swallow-related cortical activation in dysphagic versus non-dysphagic patients with Parkinson’s disease and healthy control subjects using an established swallow paradigm |                                     |                                 |                 | Task: Dysphagic parkinson - Self-paced volitional 10ml/min water swallowing by oral tube                         |                  | Time-frequency domain ERS and ERD spectral power density | In patients, a strong decrease in activation was found (p<0.05)                                                                                                                                                                                               | FC4,FT8,FT9,Fz C5,C6,CP3,CP4,P3, P4             | BA40 BA43                                     | (Pat.)                                         |
|                    |                                 |                    |                                                                                                                                                                                                       |                                     |                                 |                 |                                                                                                                  |                  |                                                          |                                                                                                                                                                                                                                                               |                                                 |                                               | Subcentral area (pat.)                         |
|                    |                                 |                    |                                                                                                                                                                                                       |                                     |                                 |                 |                                                                                                                  |                  |                                                          |                                                                                                                                                                                                                                                               |                                                 |                                               |                                                |
|                    |                                 |                    |                                                                                                                                                                                                       |                                     |                                 |                 |                                                                                                                  |                  |                                                          |                                                                                                                                                                                                                                                               |                                                 |                                               |                                                |
| Suntrup 2013 [37]  | 21/22 (95%)                     | III3               | To evaluate differences in swallow-related cortical activation in dysphagic versus non-dysphagic patients with Parkinson’s disease and healthy control subjects using an established swallow paradigm |                                     |                                 |                 |                                                                                                                  |                  | Time-frequency domain ERS and ERD spectral power density | In non-dysphagic patients: shift of peak activation toward lateral motor, premotor and parietal cortices, reduced and delayed SMA activity (p<0.01)                                                                                                           | na                                              |                                               |                                                |
|                    |                                 |                    |                                                                                                                                                                                                       |                                     |                                 |                 |                                                                                                                  |                  |                                                          |                                                                                                                                                                                                                                                               |                                                 |                                               |                                                |
|                    |                                 |                    |                                                                                                                                                                                                       |                                     |                                 |                 |                                                                                                                  |                  |                                                          |                                                                                                                                                                                                                                                               |                                                 |                                               |                                                |
|                    |                                 |                    |                                                                                                                                                                                                       |                                     |                                 |                 |                                                                                                                  |                  |                                                          |                                                                                                                                                                                                                                                               |                                                 |                                               |                                                |
| Suntrup 2013 [37]  | 21/22 (95%)                     | III3               | To evaluate differences in swallow-related cortical activation in dysphagic versus non-dysphagic patients with Parkinson’s disease and healthy control subjects using an established swallow paradigm |                                     |                                 |                 |                                                                                                                  |                  | Time-frequency domain ERS and ERD spectral power density | In dysphagic patients, reduced activation restricted to the sensorimotor areas (p<0.05).                                                                                                                                                                      |                                                 |                                               |                                                |
|                    |                                 |                    |                                                                                                                                                                                                       |                                     |                                 |                 |                                                                                                                  |                  |                                                          |                                                                                                                                                                                                                                                               |                                                 |                                               |                                                |
|                    |                                 |                    |                                                                                                                                                                                                       |                                     |                                 |                 |                                                                                                                  |                  |                                                          |                                                                                                                                                                                                                                                               |                                                 |                                               |                                                |
|                    |                                 |                    |                                                                                                                                                                                                       |                                     |                                 |                 |                                                                                                                  |                  |                                                          |                                                                                                                                                                                                                                                               |                                                 |                                               |                                                |

Supplementary Table S4 (Continued).

| MEG Reference                    | QualSyst score (%) <sup>b</sup> | NHMRC <sup>c</sup> | Objectives                                                                                                                                                                                                                                                                                        | Number of subjects analyzed                                         | Age                                                                                                               | Female/Male               | Tasks and/or conditions (bold: eligible for the review)                                                          | Number of trials | Measure                                                  | Review conclusions                                                                                                                                                                                                                                                              | Locus of interest 10-10 system <sup>a</sup>                                                                       | Locus of interest Brodmann Areas <sup>a</sup> | Locus of interest Anatomical gyri <sup>a</sup>                                 |
|----------------------------------|---------------------------------|--------------------|---------------------------------------------------------------------------------------------------------------------------------------------------------------------------------------------------------------------------------------------------------------------------------------------------|---------------------------------------------------------------------|-------------------------------------------------------------------------------------------------------------------|---------------------------|------------------------------------------------------------------------------------------------------------------|------------------|----------------------------------------------------------|---------------------------------------------------------------------------------------------------------------------------------------------------------------------------------------------------------------------------------------------------------------------------------|-------------------------------------------------------------------------------------------------------------------|-----------------------------------------------|--------------------------------------------------------------------------------|
| Pathology                        |                                 |                    |                                                                                                                                                                                                                                                                                                   |                                                                     |                                                                                                                   |                           |                                                                                                                  |                  |                                                          |                                                                                                                                                                                                                                                                                 |                                                                                                                   |                                               |                                                                                |
| Suntrup 2014 [39]                | 21/22 (95%)                     | III3               | To investigate cortical swallow-related activation in patients diagnosed with functional dysphagia by means of MEG                                                                                                                                                                                | 10                                                                  | Mean age Patients : 41.8(±12.5)                                                                                   | Patients 2/3 Controls 2/3 | <b>Condition 1: Healthy controls - Self-paced volitional 10ml/min water swallowing by oral tube</b>              | 53±9             | Time-frequency domain ERS and ERD spectral power density | Healthy controls display similar results to previous reports. In functional dysphagic patients, the pericentral activity is reduced and right lateralised (LI=0.5050) with specific activity of the right SMA, right insula, right DLPFC and right inferolateral parietal lobe. | C3,C4 Cz, F1,F2,FC1,FC2,FC3, BA6                                                                                  | BA1,2,3 C1,C2BA4                              | Postcentral gyrus (S1) Precentral gyrus (M1) PMC and SMA                       |
|                                  | Strong                          |                    | To determine whether functional dysphagia is associated with alterations in cortical swallowing processing.                                                                                                                                                                                       | Controls=5                                                          | 40.2(±16.1)                                                                                                       |                           | <b>Condition 2: Functional dysphagic subjects - Self-paced volitional 10ml/min water swallowing by oral tube</b> | 50±24            |                                                          | Pericentral activity in healthy subjects is more rostro-medial and in functional dysphagic patient, is more caudo-lateral.                                                                                                                                                      | F3,F4,FC2,FC3, BA6 FC4,FT8,FT9,Fz F3,F4,F7,F8 BA9,45 F7,F8,FT7,FT8 BA44 na BA13 C5,C6,CP3,CP4,P3, BA40 P4 na BA43 |                                               | PFC Frontal operculum Insula Lateral parietal Cx (pat.) Subcentral area (pat.) |
| Right lateralisation in patients |                                 |                    |                                                                                                                                                                                                                                                                                                   |                                                                     |                                                                                                                   |                           |                                                                                                                  |                  |                                                          |                                                                                                                                                                                                                                                                                 |                                                                                                                   |                                               |                                                                                |
| Suntrup-Krueger 2018 [41]        | 24/26 (92%)                     | II                 | To contribute robust evidence to the value of tDCS in dysphagia rehabilitation and overcome some limitations of previous studies.                                                                                                                                                                 | 10                                                                  | Mean age tDCS: 68.9(±11.5)                                                                                        | na (for the MEG group)    | <b>Condition 1: Sham group - Self-paced volitional 10ml/min water swallowing by oral tube</b>                    | 60 <sup>d</sup>  | Time-frequency domain ERS and ERD spectral power density | Control conditions (n°1) displays similar results to previous reports.                                                                                                                                                                                                          | C3,C4 Cz, F1,F2,FC1,FC2,FC3, BA6                                                                                  | BA1,2,3 C1,C2BA4                              | Postcentral gyrus (S1) Precentral gyrus (M1) PMC and SMA                       |
|                                  | Strong                          |                    | To evaluated the efficacy of a pathophysiologically reasonable tDCS protocol to improve stroke-related oropharyngeal dysphagia, conducting a randomized controlled trial (RCT) in a sufficiently large patient sample with objective clinical outcome measures alongside functional neuroimaging. | 10 had MEG, over the 59 included patients Sham group=5 tDCS group=5 | 67.2(±14.5) Controls: 67.2(±14.5) Data from the whole population N=59, no precise data for the MEG groups (N=10)) |                           | <b>Condition 2: tDCS group - Self-paced volitional 10ml/min water swallowing by oral tube</b>                    | 60 <sup>d</sup>  |                                                          |                                                                                                                                                                                                                                                                                 | FC4,FT8,FT9,Fz F3,F4,F7,F8 na C5,C6,CP3,CP4, CP5,CP6                                                              | BA45 BA23,31 BA40                             | DLPFC Posterior cingulate Cx Supramarginal gyrus                               |
|                                  |                                 |                    | To identify predictors of treatment success, which they hypothesized to be patient-related (age, lesion location/size, stroke and OD severity) and/or treatment-related (timing, tDCS+training vs tDCS alone).                                                                                    |                                                                     |                                                                                                                   |                           |                                                                                                                  |                  |                                                          |                                                                                                                                                                                                                                                                                 |                                                                                                                   |                                               |                                                                                |

|                          |                           |                                                 |                                |                                   |
|--------------------------|---------------------------|-------------------------------------------------|--------------------------------|-----------------------------------|
| BA: Brodmann area        | M1 : Primary motor cortex | NS: non significative                           | PMC : Premotor cortex          | R/L: Right/Left                   |
| Cx : Cortex              | Na: not available         | Pat.: Results specific to pathological subjects | SE: Standard error             | S1 : Primary sensory motor cortex |
| DLPFC : Dorsolateral PFC | NF : Neurofeedback        | PFC: Prefrontal cortex                          | SMA : Supplementary motor area | ±: Standard deviation             |

a. Correspondance between 10-10 system, Brodman areas and anatomical gyri were performed according to the article data but also Scrivener and Reader 2022 [79], Okamoto 2004 [80] and <http://bioimagesuite.com> (based on Lacadie et al. 2008 [81]) when coordinates were available.

b. QualSyst score: Quality score from Kmet et al.[11].

c. NHMRC: National Health and Medical Research Council level of evidence. Level I, systematic reviews; level II, randomized control trials; level III-1, pseudo-randomized control trials; level III-2, comparative studies with concurrent controls and allocation not randomized (cohort studies), case control studies, or interrupted time series with a control group; level III-3, comparative studies with historical control, two or more single-arm studies, or interrupted time series without a control group; level IV, case series.

d. Calculated based on a 15min measures with 4 swallowing par min and according to previous similar experiments)
